# Supplementary material for: Secondary injury and inflammation after intracerebral haemorrhage: a systematic review and meta-analysis of molecular markers in patient brain tissue
Source: HighWire-hosted journal article supplement (doi:10.1136/jnnp-2021-327098), 2021-08-06
Supplement: jnnp-2021-327098supp001_data_supplement.pdf [file jnnp-2021-327098supp001_data_supplement.pdf]

## Secondary injury and inflammation after intracerebral haemorrhage: a systematic review and meta-analysis of molecular markers in patient brain tissue

### Authors

James J.M. Loan MSc,<sup>1,2,3</sup> Caoimhe Kirby MSc,<sup>1,2,3</sup> Katherine Emelianova PhD,<sup>2,3</sup> Owen R. Dando PhD,<sup>2,3</sup> Michael T.C. Poon MSc,<sup>1,4</sup> Leisan Pimenova MD,<sup>5</sup> Giles E. Hardingham PhD,<sup>2,3</sup> Barry W. McColl PhD,<sup>2,3</sup> Catharina J.M. Klijn PhD,<sup>6</sup> Rustam Al-Shahi Salman FRCP Edin,<sup>1</sup> Floris H.B.M Schreuder PhD,<sup>6\*</sup> Neshika Samarasekera PhD<sup>1\*</sup>

### Affiliations

1. Centre for Clinical Brain Sciences, University of Edinburgh, Edinburgh, UK
2. Centre for Discovery Brain Sciences, University of Edinburgh, Edinburgh, UK
3. UK Dementia Research Institute at Edinburgh, University of Edinburgh, Edinburgh, UK
4. Usher Institute, University of Edinburgh, Edinburgh, UK
5. München Klinik Bogenhausen, Munich, Germany
6. Department of Neurology, Donders Institute for Brain, Cognition and Behaviour, Radboud University Medical Centre, Nijmegen, Netherlands

\*These authors contributed equally

### Index of appendices

|                                                                                                                                                                             |    |
|-----------------------------------------------------------------------------------------------------------------------------------------------------------------------------|----|
| Supplementary table 1: Search strategies.....                                                                                                                               | 2  |
| Supplementary table 2: Data extraction items .....                                                                                                                          | 7  |
| Supplementary table 3: Risk of bias assessment.....                                                                                                                         | 9  |
| Supplementary table 4: Characteristics of patients used to derive reference genome.....                                                                                     | 10 |
| Supplementary table 5: Characteristics of included studies. ....                                                                                                            | 11 |
| Supplementary table 6: Summary of findings. ....                                                                                                                            | 15 |
| Supplementary table 7: Risk of bias. ....                                                                                                                                   | 19 |
| Supplementary figure 1: Forest plot of pooled independent associations of interleukin-1 $\beta$ protein with ICH stratified by time from ICH onset to tissue retrieval..... | 24 |
| Supplementary figure 2: Funnel plot of studies included in meta-analysis of associations of interleukin-1 $\beta$ with ICH.....                                             | 25 |
| Supplementary figure 3: Gene symbols contributing to enrichment of significantly enriched GO biological process terms.....                                                  | 26 |
| Supplementary figure 4: Chord diagrams of significantly enriched GO terms. ....                                                                                             | 27 |
| Supplementary table 8: Enrichment table.....                                                                                                                                | 29 |
| References for supplementary materials .....                                                                                                                                | 32 |

## Supplementary table 1: Search strategies

## Ovid MEDLINE: 1946-18 June 2020

| .. | Search terms                                                                                                                                                                                                                                                                                                                                                                                                                                                                                                                                                                                                                                                                                                                                                                                                                                                                                                                                                                                                                                                                                                                                                                                                                                                                                                                                                                                                                                                                                                                                                                                                                                                                                                                                                                                                                                                                          |
|----|---------------------------------------------------------------------------------------------------------------------------------------------------------------------------------------------------------------------------------------------------------------------------------------------------------------------------------------------------------------------------------------------------------------------------------------------------------------------------------------------------------------------------------------------------------------------------------------------------------------------------------------------------------------------------------------------------------------------------------------------------------------------------------------------------------------------------------------------------------------------------------------------------------------------------------------------------------------------------------------------------------------------------------------------------------------------------------------------------------------------------------------------------------------------------------------------------------------------------------------------------------------------------------------------------------------------------------------------------------------------------------------------------------------------------------------------------------------------------------------------------------------------------------------------------------------------------------------------------------------------------------------------------------------------------------------------------------------------------------------------------------------------------------------------------------------------------------------------------------------------------------------|
| 1  | inflammation/ or inflammat*.mp.                                                                                                                                                                                                                                                                                                                                                                                                                                                                                                                                                                                                                                                                                                                                                                                                                                                                                                                                                                                                                                                                                                                                                                                                                                                                                                                                                                                                                                                                                                                                                                                                                                                                                                                                                                                                                                                       |
| 2  | immune system.mp. or immune system/                                                                                                                                                                                                                                                                                                                                                                                                                                                                                                                                                                                                                                                                                                                                                                                                                                                                                                                                                                                                                                                                                                                                                                                                                                                                                                                                                                                                                                                                                                                                                                                                                                                                                                                                                                                                                                                   |
| 3  | cellular immunity/ or innate immunity/ or adaptive immunity/ or immunity/ or humoral immunity/                                                                                                                                                                                                                                                                                                                                                                                                                                                                                                                                                                                                                                                                                                                                                                                                                                                                                                                                                                                                                                                                                                                                                                                                                                                                                                                                                                                                                                                                                                                                                                                                                                                                                                                                                                                        |
| 4  | glia cell/ or astrocyte/ or astrocyt*.mp.                                                                                                                                                                                                                                                                                                                                                                                                                                                                                                                                                                                                                                                                                                                                                                                                                                                                                                                                                                                                                                                                                                                                                                                                                                                                                                                                                                                                                                                                                                                                                                                                                                                                                                                                                                                                                                             |
| 5  | immunohistochemistry/ or microglia/ or nervous system inflammation/ or microgli*.mp.                                                                                                                                                                                                                                                                                                                                                                                                                                                                                                                                                                                                                                                                                                                                                                                                                                                                                                                                                                                                                                                                                                                                                                                                                                                                                                                                                                                                                                                                                                                                                                                                                                                                                                                                                                                                  |
| 6  | leukocyte/ or lymphocyte/ or Leukocyt*.mp. or monocyte/                                                                                                                                                                                                                                                                                                                                                                                                                                                                                                                                                                                                                                                                                                                                                                                                                                                                                                                                                                                                                                                                                                                                                                                                                                                                                                                                                                                                                                                                                                                                                                                                                                                                                                                                                                                                                               |
| 7  | glia/ or glia*.mp.                                                                                                                                                                                                                                                                                                                                                                                                                                                                                                                                                                                                                                                                                                                                                                                                                                                                                                                                                                                                                                                                                                                                                                                                                                                                                                                                                                                                                                                                                                                                                                                                                                                                                                                                                                                                                                                                    |
| 8  | neuroglia*.mp.                                                                                                                                                                                                                                                                                                                                                                                                                                                                                                                                                                                                                                                                                                                                                                                                                                                                                                                                                                                                                                                                                                                                                                                                                                                                                                                                                                                                                                                                                                                                                                                                                                                                                                                                                                                                                                                                        |
| 9  | macrophage/ or phagocytosis/ or phagocyte/ or phagocyt*.mp. or neutrophil/                                                                                                                                                                                                                                                                                                                                                                                                                                                                                                                                                                                                                                                                                                                                                                                                                                                                                                                                                                                                                                                                                                                                                                                                                                                                                                                                                                                                                                                                                                                                                                                                                                                                                                                                                                                                            |
| 10 | (macrophage or neutrophil*).mp.                                                                                                                                                                                                                                                                                                                                                                                                                                                                                                                                                                                                                                                                                                                                                                                                                                                                                                                                                                                                                                                                                                                                                                                                                                                                                                                                                                                                                                                                                                                                                                                                                                                                                                                                                                                                                                                       |
| 11 | monocyt*.mp. or autoinflammatory disease/                                                                                                                                                                                                                                                                                                                                                                                                                                                                                                                                                                                                                                                                                                                                                                                                                                                                                                                                                                                                                                                                                                                                                                                                                                                                                                                                                                                                                                                                                                                                                                                                                                                                                                                                                                                                                                             |
| 12 | granulocyte/ or granulocyt*.mp.                                                                                                                                                                                                                                                                                                                                                                                                                                                                                                                                                                                                                                                                                                                                                                                                                                                                                                                                                                                                                                                                                                                                                                                                                                                                                                                                                                                                                                                                                                                                                                                                                                                                                                                                                                                                                                                       |
| 13 | tanycyte/ or Tanycyte*.mp.                                                                                                                                                                                                                                                                                                                                                                                                                                                                                                                                                                                                                                                                                                                                                                                                                                                                                                                                                                                                                                                                                                                                                                                                                                                                                                                                                                                                                                                                                                                                                                                                                                                                                                                                                                                                                                                            |
| 14 | necro*.mp.                                                                                                                                                                                                                                                                                                                                                                                                                                                                                                                                                                                                                                                                                                                                                                                                                                                                                                                                                                                                                                                                                                                                                                                                                                                                                                                                                                                                                                                                                                                                                                                                                                                                                                                                                                                                                                                                            |
| 15 | necrosis/ or brain necrosis/                                                                                                                                                                                                                                                                                                                                                                                                                                                                                                                                                                                                                                                                                                                                                                                                                                                                                                                                                                                                                                                                                                                                                                                                                                                                                                                                                                                                                                                                                                                                                                                                                                                                                                                                                                                                                                                          |
| 16 | hyperemia/ or hypersemia*.mp.                                                                                                                                                                                                                                                                                                                                                                                                                                                                                                                                                                                                                                                                                                                                                                                                                                                                                                                                                                                                                                                                                                                                                                                                                                                                                                                                                                                                                                                                                                                                                                                                                                                                                                                                                                                                                                                         |
| 17 | apoptosis/ or apopto*.mp.                                                                                                                                                                                                                                                                                                                                                                                                                                                                                                                                                                                                                                                                                                                                                                                                                                                                                                                                                                                                                                                                                                                                                                                                                                                                                                                                                                                                                                                                                                                                                                                                                                                                                                                                                                                                                                                             |
| 18 | gliosis/                                                                                                                                                                                                                                                                                                                                                                                                                                                                                                                                                                                                                                                                                                                                                                                                                                                                                                                                                                                                                                                                                                                                                                                                                                                                                                                                                                                                                                                                                                                                                                                                                                                                                                                                                                                                                                                                              |
| 19 | glio*.mp.                                                                                                                                                                                                                                                                                                                                                                                                                                                                                                                                                                                                                                                                                                                                                                                                                                                                                                                                                                                                                                                                                                                                                                                                                                                                                                                                                                                                                                                                                                                                                                                                                                                                                                                                                                                                                                                                             |
| 20 | blood clot lysis/ or clot*.mp. or blood clot/ or blood clot retraction/                                                                                                                                                                                                                                                                                                                                                                                                                                                                                                                                                                                                                                                                                                                                                                                                                                                                                                                                                                                                                                                                                                                                                                                                                                                                                                                                                                                                                                                                                                                                                                                                                                                                                                                                                                                                               |
| 21 | thrombin/ or thrombosis/                                                                                                                                                                                                                                                                                                                                                                                                                                                                                                                                                                                                                                                                                                                                                                                                                                                                                                                                                                                                                                                                                                                                                                                                                                                                                                                                                                                                                                                                                                                                                                                                                                                                                                                                                                                                                                                              |
| 22 | tumor necrosis factor alpha/ or interleukin 6/ or cytokine/ or endogenous compound/ or cytokin*.mp. or alpha interferon/ or cytokinesis/                                                                                                                                                                                                                                                                                                                                                                                                                                                                                                                                                                                                                                                                                                                                                                                                                                                                                                                                                                                                                                                                                                                                                                                                                                                                                                                                                                                                                                                                                                                                                                                                                                                                                                                                              |
| 23 | chemotaxis/ or chemokinesis/ or chemokine/ or chemokin*.mp.                                                                                                                                                                                                                                                                                                                                                                                                                                                                                                                                                                                                                                                                                                                                                                                                                                                                                                                                                                                                                                                                                                                                                                                                                                                                                                                                                                                                                                                                                                                                                                                                                                                                                                                                                                                                                           |
| 24 | interleukin.mp. or cytokine/                                                                                                                                                                                                                                                                                                                                                                                                                                                                                                                                                                                                                                                                                                                                                                                                                                                                                                                                                                                                                                                                                                                                                                                                                                                                                                                                                                                                                                                                                                                                                                                                                                                                                                                                                                                                                                                          |
| 25 | (Interleukin?1* or il?1* or Il1* or Interleukin?2* or il?2* or Il2* or Interleukin?3* or il?3* or Il3* or Interleukin?4* or il?4* or Il4* or Interleukin?5* or il?5* or Il5* or Interleukin?6* or il?6* or Il6* or Interleukin?7* or il?7* or Il7* or Interleukin?8* or il?8* or Il8* or CXCL8 or Interleukin?9* or il?9* or Il9* or Interleukin?9*).mp. [mp=title, abstract, original title, name of substance word, subject heading word, floating sub-heading word, keyword heading word, protocol supplementary concept word, rare disease supplementary concept word, unique identifier, synonyms]                                                                                                                                                                                                                                                                                                                                                                                                                                                                                                                                                                                                                                                                                                                                                                                                                                                                                                                                                                                                                                                                                                                                                                                                                                                                               |
| 26 | (Msr1 or Cybb or Lgals3bp or Cst7 or Tlr2 or Nme1 or Rps5 or Ssr4 or P2ry13 or Col27a1 or Elmo1 or Numb or Slc2a5 or Cd244 or Spp1 or Lilrb4 or Hcar2 or Fxyd5 or Il1b or MS4A6A or Gpr65 or Tnf or Srgn or Ifi30 or Cxcl10 or Cd72 or Tspo or Il2rg or Gpr84 or Emp3 or Plaur or Tagln2 or Id2 or Sdc3 or Dab2 or Man2a1 or Psat1 or Map3k8 or Ctsl or Mthfd2 or Cxcl16 or Cd74 or Ctsc or Rnf149 or Smim3 or Cpd or HLA-E or Glrx or Adam9 or Galns or C3ar1 or Atp1a1 or Slamf9 or LILRB4 or Sall1 or Rab31 or Clasp2 or Arap3 or Tln2 or Gpr56 or Il7r or P2ry12 or Slc39a14 or Csm3 or FCGR3A or Ifit1 or Rpl32 or Rps26 or Iqgap1 or Socs3 or Gbp2 or HLA-DOB or Sult1a1 or Tgfbr1 or Naaa or Plxdc2 or Nuak2 or B4galnt1 or Hmxo1 or Ier3 or Ccl2 or CCL13 or St6gal1 or Mgl1 or Rtp4 or Manf or Klhdcb8 or Sbn2 or Cd300lf or Capg or EIF1AX or Srgap2 or Gcnt2 or Ifngr1 or Il10ra or Kif21b or Upk1b or Atp8a2 or Nucb2 or Slc46a3 or Tppp or Khlh24 or Garnl3 or Sft2d2 or Flna or Rasgrp3 or Bank1 or Pcmd2 or Pcmd1 or Sbf2 or Cass4 or Slc9a9 or Mlir1 or C19orf38 or Tlr12P or Aprt or C5ar1 or Cbfa2t3 or Ccr1 or Ctsh or Cx3cr1v Fkbp5 or Lpin1 or Hpgd or Il15rav IL4R or Lgals9 or Tmed1 or P2rx7 or Ptafr or Ccl7 or Sepp1 or Spint1 or Tnfrsf17 or Top3a or Gpr34 or Ip6k1 or Slc40a1 or Gpr35 or Zdhhc12 or Abhd11 or MS4A6A or Smap2 or Rin2 or Snx29 or Atp13a2 or Ifitm2 or Maged2 or Trem2 or Ncln or Rcbtb2 or Ccdc86 or Rnf169 or Lpp or Dennd6a or A630033H20Rik or Arid5a or Ncaph or Marf1 or Slc2a6 or Fcrl1 or Pilra or Gimap6 or ZNF705A or Rab6b or Eif5a or Tacc1 or Bend6 or Gmppb or Pilrb2).mp. [mp=title, abstract, original title, name of substance word, subject heading word, floating sub-heading word, keyword heading word, protocol supplementary concept word, rare disease supplementary concept word, unique identifier, synonyms] |
| 27 | (HMOX1 or NQO1 or SLC7A11 or SRXN1 or GCLC or CAT or NFE2L2).mp. [mp=title, abstract, original title, name of substance word, subject heading word, floating sub-heading word, keyword heading word, protocol supplementary concept word, rare disease supplementary concept word, unique identifier, synonyms]                                                                                                                                                                                                                                                                                                                                                                                                                                                                                                                                                                                                                                                                                                                                                                                                                                                                                                                                                                                                                                                                                                                                                                                                                                                                                                                                                                                                                                                                                                                                                                       |
| 28 | (LCN2 or STEAP4 or S1PR3 or TIMP1 or HSPB1 or CXCL10 or CD44 or OSMR or CP or SERPINA3 or ASPG or VIM or GFAP or C3 or HLA-E or SERPING1 or HLA-A or GBP2 or FBLN5 or FKBP5 or PSMB8 or SRGN or AMIGO2 or CLCF1 or TGM1 or PTX3 or S100A10 or SPHK1 or CD109 or PTGS2 or EMP1 or SLC10A6 or TM4SF1 or B3GNT5 or CD14).mp. [mp=title, abstract, original title, name of substance word, subject heading word, floating sub-heading word, keyword heading word, protocol supplementary concept word, rare disease supplementary concept word, unique identifier, synonyms]                                                                                                                                                                                                                                                                                                                                                                                                                                                                                                                                                                                                                                                                                                                                                                                                                                                                                                                                                                                                                                                                                                                                                                                                                                                                                                              |
| 29 | NF-kappa B/ or (NF-E2-Related Factor 2 or Nuclear factor erythroid 2-related factor 2 or NRF2).mp. or Heme oxygenase-1/ or HMGB1 protein/ or hirudins/ or (Argatroban or Nafamostat mesilate or Oxymatrine or TAK-242).mp.                                                                                                                                                                                                                                                                                                                                                                                                                                                                                                                                                                                                                                                                                                                                                                                                                                                                                                                                                                                                                                                                                                                                                                                                                                                                                                                                                                                                                                                                                                                                                                                                                                                            |
| 30 | heme*.mp. or heme oxygenase/ or heme/ or heme oxygenase 1/                                                                                                                                                                                                                                                                                                                                                                                                                                                                                                                                                                                                                                                                                                                                                                                                                                                                                                                                                                                                                                                                                                                                                                                                                                                                                                                                                                                                                                                                                                                                                                                                                                                                                                                                                                                                                            |
| 31 | hemin.mp. or hemin/                                                                                                                                                                                                                                                                                                                                                                                                                                                                                                                                                                                                                                                                                                                                                                                                                                                                                                                                                                                                                                                                                                                                                                                                                                                                                                                                                                                                                                                                                                                                                                                                                                                                                                                                                                                                                                                                   |
| 32 | fibrin*.mp. or fibrin degradation product/ or fibrin/                                                                                                                                                                                                                                                                                                                                                                                                                                                                                                                                                                                                                                                                                                                                                                                                                                                                                                                                                                                                                                                                                                                                                                                                                                                                                                                                                                                                                                                                                                                                                                                                                                                                                                                                                                                                                                 |
| 33 | superoxide.mp. or superoxide/                                                                                                                                                                                                                                                                                                                                                                                                                                                                                                                                                                                                                                                                                                                                                                                                                                                                                                                                                                                                                                                                                                                                                                                                                                                                                                                                                                                                                                                                                                                                                                                                                                                                                                                                                                                                                                                         |

|    |                                                                                                                                                                                                                                                                                                                                                                                                                                                                                                                                                                                                                                                                                                                                                                                                                                                                                                                                                                                                                                                                                                                                                                                                                                                                                                                                                                                                                                                                                                                                                                                                                                                                                                                                                                                                                                                                                                                                                                                                   |
|----|---------------------------------------------------------------------------------------------------------------------------------------------------------------------------------------------------------------------------------------------------------------------------------------------------------------------------------------------------------------------------------------------------------------------------------------------------------------------------------------------------------------------------------------------------------------------------------------------------------------------------------------------------------------------------------------------------------------------------------------------------------------------------------------------------------------------------------------------------------------------------------------------------------------------------------------------------------------------------------------------------------------------------------------------------------------------------------------------------------------------------------------------------------------------------------------------------------------------------------------------------------------------------------------------------------------------------------------------------------------------------------------------------------------------------------------------------------------------------------------------------------------------------------------------------------------------------------------------------------------------------------------------------------------------------------------------------------------------------------------------------------------------------------------------------------------------------------------------------------------------------------------------------------------------------------------------------------------------------------------------------|
| 34 | hydrogen peroxide.mp. or hydrogen peroxide/                                                                                                                                                                                                                                                                                                                                                                                                                                                                                                                                                                                                                                                                                                                                                                                                                                                                                                                                                                                                                                                                                                                                                                                                                                                                                                                                                                                                                                                                                                                                                                                                                                                                                                                                                                                                                                                                                                                                                       |
| 35 | H2O2.mp.                                                                                                                                                                                                                                                                                                                                                                                                                                                                                                                                                                                                                                                                                                                                                                                                                                                                                                                                                                                                                                                                                                                                                                                                                                                                                                                                                                                                                                                                                                                                                                                                                                                                                                                                                                                                                                                                                                                                                                                          |
| 36 | complement component C2a/ or complement component C2b/ or complement factor D/ or complement receptor antagonist/ or complement component C1r/ or complement membrane attack complex/ or complement activation/ or complement component C5a/ or complement/ or complement component C5a receptor/ or complement component C1/ or complement component C4b binding protein/ or complement component C6/ or complement system/ or complement inhibitor/ or classical complement pathway C3 C5 convertase/ or complement component C4d/ or complement component C8b/ or complement component C3d receptor/ or complement dependent cytotoxicity/ or complement component C4 binding protein/ or complement inhibition/ or complement component C3/ or complement component C2/ or complement component C3 receptor/ or complement component C3a/ or complement factor I/ or complement component C9/ or complement component C5 inhibitor/ or complement factor H/ or complement component C8/ or alternative complement pathway C3 C5 convertase/ or complement fixation/ or complement component C3c/ or complement.mp. or complement blood level/ or complement component C1q antibody/ or complement deposition/ or complement component C4b/ or complement alternative pathway/ or complement component C3b receptor/ or vaccinia virus complement control protein/ or complement component C1s inhibitor/ or complement component C3b/ or complement component C5/ or complement receptor/ or complement component C4/ or complement component C8a/ or complement component C1s/ or complement component C4a/ or complement factor/ or complement classical pathway/ or "complement component C5a [dearginine]" or complement component C3 inhibitor/ or complement component C3d/ or complement component C7/ or complement component C5b/ or complement component C5a receptor antagonist/ or complement receptor affecting agent/ or complement component C1q/ or complement fixation test/ |
| 37 | interferon.mp. or interferon/                                                                                                                                                                                                                                                                                                                                                                                                                                                                                                                                                                                                                                                                                                                                                                                                                                                                                                                                                                                                                                                                                                                                                                                                                                                                                                                                                                                                                                                                                                                                                                                                                                                                                                                                                                                                                                                                                                                                                                     |
| 38 | NF\$KB.mp.                                                                                                                                                                                                                                                                                                                                                                                                                                                                                                                                                                                                                                                                                                                                                                                                                                                                                                                                                                                                                                                                                                                                                                                                                                                                                                                                                                                                                                                                                                                                                                                                                                                                                                                                                                                                                                                                                                                                                                                        |
| 39 | tumor necrosis factor.mp.                                                                                                                                                                                                                                                                                                                                                                                                                                                                                                                                                                                                                                                                                                                                                                                                                                                                                                                                                                                                                                                                                                                                                                                                                                                                                                                                                                                                                                                                                                                                                                                                                                                                                                                                                                                                                                                                                                                                                                         |
| 40 | matrix metalloproteinase/ or matrix metalloproteinase inhibitor/ or metalloproteinase/ or matrix metalloprotease.mp. or collagenase/                                                                                                                                                                                                                                                                                                                                                                                                                                                                                                                                                                                                                                                                                                                                                                                                                                                                                                                                                                                                                                                                                                                                                                                                                                                                                                                                                                                                                                                                                                                                                                                                                                                                                                                                                                                                                                                              |
| 41 | MMP*.mp.                                                                                                                                                                                                                                                                                                                                                                                                                                                                                                                                                                                                                                                                                                                                                                                                                                                                                                                                                                                                                                                                                                                                                                                                                                                                                                                                                                                                                                                                                                                                                                                                                                                                                                                                                                                                                                                                                                                                                                                          |
| 42 | AQ\$4.mp. or aquaporin 4/                                                                                                                                                                                                                                                                                                                                                                                                                                                                                                                                                                                                                                                                                                                                                                                                                                                                                                                                                                                                                                                                                                                                                                                                                                                                                                                                                                                                                                                                                                                                                                                                                                                                                                                                                                                                                                                                                                                                                                         |
| 43 | aquaporin?4.mp.                                                                                                                                                                                                                                                                                                                                                                                                                                                                                                                                                                                                                                                                                                                                                                                                                                                                                                                                                                                                                                                                                                                                                                                                                                                                                                                                                                                                                                                                                                                                                                                                                                                                                                                                                                                                                                                                                                                                                                                   |
| 44 | NOS.mp.                                                                                                                                                                                                                                                                                                                                                                                                                                                                                                                                                                                                                                                                                                                                                                                                                                                                                                                                                                                                                                                                                                                                                                                                                                                                                                                                                                                                                                                                                                                                                                                                                                                                                                                                                                                                                                                                                                                                                                                           |
| 45 | nitric oxide synthase/                                                                                                                                                                                                                                                                                                                                                                                                                                                                                                                                                                                                                                                                                                                                                                                                                                                                                                                                                                                                                                                                                                                                                                                                                                                                                                                                                                                                                                                                                                                                                                                                                                                                                                                                                                                                                                                                                                                                                                            |
| 46 | caspase inhibitor/ or caspase 5/ or caspase 8 inhibitor/ or initiator caspase/ or caspase 12/ or caspase 11/ or caspase 6/ or caspase 10/ or caspase 14/ or caspase/ or caspase recruitment domain protein 4/ or apoptosis repressor with caspase recruitment domain/ or caspase 9 inhibitor/ or caspase.mp. or caspase 13/ or caspase recruitment domain signaling protein/ or caspase 8/ or caspase 2 inhibitor/ or caspase 3/ or caspase activated deoxyribonuclease/ or caspase recruitment domain protein 15/ or "second mitochondrial activator of caspase"/ or effector caspase/ or caspase 3 inhibitor/ or caspase 9/ or caspase 4/ or "caspase activation and recruitment domain"/ or caspase assay/ or caspase 2/ or caspase 7/                                                                                                                                                                                                                                                                                                                                                                                                                                                                                                                                                                                                                                                                                                                                                                                                                                                                                                                                                                                                                                                                                                                                                                                                                                                         |
| 47 | Damage associated molecular pattern.mp.                                                                                                                                                                                                                                                                                                                                                                                                                                                                                                                                                                                                                                                                                                                                                                                                                                                                                                                                                                                                                                                                                                                                                                                                                                                                                                                                                                                                                                                                                                                                                                                                                                                                                                                                                                                                                                                                                                                                                           |
| 48 | DAMP.mp.                                                                                                                                                                                                                                                                                                                                                                                                                                                                                                                                                                                                                                                                                                                                                                                                                                                                                                                                                                                                                                                                                                                                                                                                                                                                                                                                                                                                                                                                                                                                                                                                                                                                                                                                                                                                                                                                                                                                                                                          |
| 49 | pathogen associated molecular pattern/ or PAMP.mp.                                                                                                                                                                                                                                                                                                                                                                                                                                                                                                                                                                                                                                                                                                                                                                                                                                                                                                                                                                                                                                                                                                                                                                                                                                                                                                                                                                                                                                                                                                                                                                                                                                                                                                                                                                                                                                                                                                                                                |
| 50 | autophagy.mp. or autophagy/                                                                                                                                                                                                                                                                                                                                                                                                                                                                                                                                                                                                                                                                                                                                                                                                                                                                                                                                                                                                                                                                                                                                                                                                                                                                                                                                                                                                                                                                                                                                                                                                                                                                                                                                                                                                                                                                                                                                                                       |
| 51 | toll like receptor 4/ or toll\$like receptor.mp. or toll like receptor/                                                                                                                                                                                                                                                                                                                                                                                                                                                                                                                                                                                                                                                                                                                                                                                                                                                                                                                                                                                                                                                                                                                                                                                                                                                                                                                                                                                                                                                                                                                                                                                                                                                                                                                                                                                                                                                                                                                           |
| 52 | toll like receptor 2/                                                                                                                                                                                                                                                                                                                                                                                                                                                                                                                                                                                                                                                                                                                                                                                                                                                                                                                                                                                                                                                                                                                                                                                                                                                                                                                                                                                                                                                                                                                                                                                                                                                                                                                                                                                                                                                                                                                                                                             |
| 53 | inflammasome/ or inflammasone.mp.                                                                                                                                                                                                                                                                                                                                                                                                                                                                                                                                                                                                                                                                                                                                                                                                                                                                                                                                                                                                                                                                                                                                                                                                                                                                                                                                                                                                                                                                                                                                                                                                                                                                                                                                                                                                                                                                                                                                                                 |
| 54 | eicosanoid.mp. or icosanoid/                                                                                                                                                                                                                                                                                                                                                                                                                                                                                                                                                                                                                                                                                                                                                                                                                                                                                                                                                                                                                                                                                                                                                                                                                                                                                                                                                                                                                                                                                                                                                                                                                                                                                                                                                                                                                                                                                                                                                                      |
| 55 | leukotriene D4/ or leukotriene D4 derivative/ or leukotriene A4 hydrolase inhibitor/ or leukotriene A4 methyl ester/ or leukotriene B4/ or leukotriene A4 derivative/ or leukotriene receptor affecting agent/ or leukotriene A4 hydrolase/ or leukotriene B3/ or leukotriene/ or leukotriene E4/ or leukotriene receptor blocking agent/ or leukotriene receptor stimulating agent/ or leukotriene.mp. or "prostaglandin,thromboxane or leukotriene receptor affecting agents"/ or leukotriene A4/ or leukotriene B4 receptor/ or leukotriene B5/ or leukotriene derivative/ or leukotriene receptor/ or leukotriene E4 derivative/ or leukotriene C4 derivative/ or leukotriene B4 receptor antagonist/ or leukotriene C4/ or leukotriene F4/ or leukotriene C4 synthase/ or leukotriene B4 derivative/ or leukotriene D4 receptor/                                                                                                                                                                                                                                                                                                                                                                                                                                                                                                                                                                                                                                                                                                                                                                                                                                                                                                                                                                                                                                                                                                                                                             |
| 56 | prostaglandin F1 alpha/ or prostaglandin F2/ or prostaglandin blood level/ or prostaglandin E synthase 1/ or prostaglandin E receptor 2/ or prostaglandin D synthase/ or delta12 prostaglandin J2/ or prostaglandin/ or prostaglandin A/ or prostaglandin E3/ or prostaglandin synthesis/ or prostaglandin synthesis inhibition/ or prostaglandin E2 trometamol/ or prostaglandin E synthase/ or prostaglandin E receptor 1/ or prostaglandin E1 derivative/ or prostaglandin receptor/ or "prostaglandin,thromboxane or leukotriene receptor affecting agents"/ or prostaglandin B1 polymer/ or prostaglandin synthase/ or prostaglandin B/ or prostaglandin A2 isopropyl ester/ or prostaglandin B2/ or prostaglandin E receptor/ or prostaglandin F/ or prostaglandin endoperoxide/ or prostaglandin G/ or prostaglandin F2 alpha/ or prostaglandin G2/ or prostaglandin B1/ or prostaglandin receptor stimulating agent/ or prostaglandin D/ or 15 deoxy delta12,14 prostaglandin J2/ or prostaglandin urine level/ or prostaglandin derivative/ or prostaglandin J2/ or prostaglandin E2 derivative/ or prostaglandin E receptor 4/ or prostaglandin D2 derivative/ or prostaglandin metabolism/ or prostaglandin D2/ or prostaglandin H/ or prostaglandin E2/ or prostaglandin F2 alpha trometamol/ or prostaglandin H2/ or prostaglandin receptor blocking agent/ or prostaglandin F2 alpha isopropyl ester/ or prostaglandin synthase inhibitor/ or prostaglandin A1/ or prostaglandin E1/ or prostaglandin inhibitor/ or prostaglandin F3 alpha/ or prostaglandin E/ or prostaglandin B1 derivative/ or prostaglandin F2 alpha derivative/ or prostaglandin E2 methyl ester/ or prostaglandin I3/ or prostaglandin transporter/ or prostaglandin A2/ or prostaglandin release/ or prostaglandin.mp. or prostaglandin E receptor 3/ or prostaglandin receptor affecting agent/                                                                                                            |
| 57 | prostacyclin/                                                                                                                                                                                                                                                                                                                                                                                                                                                                                                                                                                                                                                                                                                                                                                                                                                                                                                                                                                                                                                                                                                                                                                                                                                                                                                                                                                                                                                                                                                                                                                                                                                                                                                                                                                                                                                                                                                                                                                                     |

|    |                                                                                                                                                                                                                                                                                                                                                                                                                                                                |
|----|----------------------------------------------------------------------------------------------------------------------------------------------------------------------------------------------------------------------------------------------------------------------------------------------------------------------------------------------------------------------------------------------------------------------------------------------------------------|
| 58 | ((brain\$ or cerebr\$ or cerebell\$ or intracerebr\$ or intracran\$ or parenchyma\$ or intraventricular or infratentorial or supratentorial or basal gang\$ or ganglion\$ or putaminal or putamen or posterior fossa or brain?stem or intra?axial or lobar or deep or thalam\$ or cortical or superficial or vertebrobasil\$ or front\$ or tempor\$ or pariet\$ or occipit\$) adj (haemorrhage\$ or hemorrhage\$ or haematoma\$ or hematoma\$ or bleed\$)).tw. |
| 59 | (h?emorrhag\$ adj (stroke\$ or cerebrovasc\$ or cerebr?vasc\$ or cerebral vascul\$ or brain vascul\$ or cva\$ or apoplex\$ or attack\$ or event\$ or insult\$)).tw.                                                                                                                                                                                                                                                                                            |
| 60 | basal ganglion hemorrhage/ or exp brain hematoma/ or exp brain hemorrhage/ or cerebral hemorrhage/                                                                                                                                                                                                                                                                                                                                                             |
| 61 | 58 or 59 or 60                                                                                                                                                                                                                                                                                                                                                                                                                                                 |
| 62 | Receptors, Cell Surface/                                                                                                                                                                                                                                                                                                                                                                                                                                       |
| 63 | (post\$mortem or biops* or autopsy or intra\$operative or patholog* or histopatholog*).mp. or immunohistochemistry/                                                                                                                                                                                                                                                                                                                                            |
| 64 | BRAIN/en [Enzymology]                                                                                                                                                                                                                                                                                                                                                                                                                                          |
| 65 | 62 or 63 or 64                                                                                                                                                                                                                                                                                                                                                                                                                                                 |
| 66 | 1 or 2 or 3 or 4 or 5 or 6 or 7 or 8 or 9 or 10 or 11 or 12 or 13 or 14 or 15 or 16 or 17 or 18 or 19 or 20 or 21 or 22 or 23 or 24 or 25 or 26 or 27 or 28 or 29 or 30 or 31 or 32 or 33 or 34 or 35 or 36 or 37 or 38 or 39 or 40 or 41 or 42 or 43 or 44 or 45 or 46 or 47 or 48 or 49 or 50 or 51 or 52 or 53 or 54 or 55 or 56 or 57                                                                                                                      |
| 67 | (t?cell or t?lymphocyt* or t-cell).mp. or T lymphocyte/                                                                                                                                                                                                                                                                                                                                                                                                        |
| 68 | 66 or 67                                                                                                                                                                                                                                                                                                                                                                                                                                                       |
| 69 | 61 and 65 and 68                                                                                                                                                                                                                                                                                                                                                                                                                                               |
| 70 | exp animals/ not humans/                                                                                                                                                                                                                                                                                                                                                                                                                                       |
| 71 | 69 not 70                                                                                                                                                                                                                                                                                                                                                                                                                                                      |

**Ovid EMBASE: 1974 to 18 June 2020**

| .. | Search terms                                                                                                                                                                                                                                                                                                                                                                                                                                                                                                                                                                                                                                                                                                                                                                                                                                                                                                                                                                                                                                                                                                                                                                                                                                                                                                                                   |
|----|------------------------------------------------------------------------------------------------------------------------------------------------------------------------------------------------------------------------------------------------------------------------------------------------------------------------------------------------------------------------------------------------------------------------------------------------------------------------------------------------------------------------------------------------------------------------------------------------------------------------------------------------------------------------------------------------------------------------------------------------------------------------------------------------------------------------------------------------------------------------------------------------------------------------------------------------------------------------------------------------------------------------------------------------------------------------------------------------------------------------------------------------------------------------------------------------------------------------------------------------------------------------------------------------------------------------------------------------|
| 1  | inflammation/ or inflammat*.mp.                                                                                                                                                                                                                                                                                                                                                                                                                                                                                                                                                                                                                                                                                                                                                                                                                                                                                                                                                                                                                                                                                                                                                                                                                                                                                                                |
| 2  | immune system.mp. or immune system/                                                                                                                                                                                                                                                                                                                                                                                                                                                                                                                                                                                                                                                                                                                                                                                                                                                                                                                                                                                                                                                                                                                                                                                                                                                                                                            |
| 3  | cellular immunity/ or innate immunity/ or adaptive immunity/ or immunity/ or humoral immunity/                                                                                                                                                                                                                                                                                                                                                                                                                                                                                                                                                                                                                                                                                                                                                                                                                                                                                                                                                                                                                                                                                                                                                                                                                                                 |
| 4  | glia cell/ or astrocyte/ or astrocyt*.mp.                                                                                                                                                                                                                                                                                                                                                                                                                                                                                                                                                                                                                                                                                                                                                                                                                                                                                                                                                                                                                                                                                                                                                                                                                                                                                                      |
| 5  | immunohistochemistry/ or microglia/ or nervous system inflammation/ or microgli*.mp.                                                                                                                                                                                                                                                                                                                                                                                                                                                                                                                                                                                                                                                                                                                                                                                                                                                                                                                                                                                                                                                                                                                                                                                                                                                           |
| 6  | leukocyte/ or lymphocyte/ or Leukocyt*.mp. or monocyte/                                                                                                                                                                                                                                                                                                                                                                                                                                                                                                                                                                                                                                                                                                                                                                                                                                                                                                                                                                                                                                                                                                                                                                                                                                                                                        |
| 7  | glia/ or glia*.mp.                                                                                                                                                                                                                                                                                                                                                                                                                                                                                                                                                                                                                                                                                                                                                                                                                                                                                                                                                                                                                                                                                                                                                                                                                                                                                                                             |
| 8  | neuroglia*.mp.                                                                                                                                                                                                                                                                                                                                                                                                                                                                                                                                                                                                                                                                                                                                                                                                                                                                                                                                                                                                                                                                                                                                                                                                                                                                                                                                 |
| 9  | macrophage/ or phagocytosis/ or phagocyte/ or phagocyt*.mp. or neutrophil/                                                                                                                                                                                                                                                                                                                                                                                                                                                                                                                                                                                                                                                                                                                                                                                                                                                                                                                                                                                                                                                                                                                                                                                                                                                                     |
| 10 | (macrophage or neutrophil*).mp.                                                                                                                                                                                                                                                                                                                                                                                                                                                                                                                                                                                                                                                                                                                                                                                                                                                                                                                                                                                                                                                                                                                                                                                                                                                                                                                |
| 11 | monocyt*.mp. or autoinflammatory disease/                                                                                                                                                                                                                                                                                                                                                                                                                                                                                                                                                                                                                                                                                                                                                                                                                                                                                                                                                                                                                                                                                                                                                                                                                                                                                                      |
| 12 | granulocyte/ or granulocyt*.mp.                                                                                                                                                                                                                                                                                                                                                                                                                                                                                                                                                                                                                                                                                                                                                                                                                                                                                                                                                                                                                                                                                                                                                                                                                                                                                                                |
| 13 | tanycyte/ or Tanycyte*.mp.                                                                                                                                                                                                                                                                                                                                                                                                                                                                                                                                                                                                                                                                                                                                                                                                                                                                                                                                                                                                                                                                                                                                                                                                                                                                                                                     |
| 14 | necro*.mp.                                                                                                                                                                                                                                                                                                                                                                                                                                                                                                                                                                                                                                                                                                                                                                                                                                                                                                                                                                                                                                                                                                                                                                                                                                                                                                                                     |
| 15 | necrosis/ or brain necrosis/                                                                                                                                                                                                                                                                                                                                                                                                                                                                                                                                                                                                                                                                                                                                                                                                                                                                                                                                                                                                                                                                                                                                                                                                                                                                                                                   |
| 16 | hyperemia/ or hypersemi*.mp.                                                                                                                                                                                                                                                                                                                                                                                                                                                                                                                                                                                                                                                                                                                                                                                                                                                                                                                                                                                                                                                                                                                                                                                                                                                                                                                   |
| 17 | apoptosis/ or apopto*.mp.                                                                                                                                                                                                                                                                                                                                                                                                                                                                                                                                                                                                                                                                                                                                                                                                                                                                                                                                                                                                                                                                                                                                                                                                                                                                                                                      |
| 18 | gliosis/                                                                                                                                                                                                                                                                                                                                                                                                                                                                                                                                                                                                                                                                                                                                                                                                                                                                                                                                                                                                                                                                                                                                                                                                                                                                                                                                       |
| 19 | glio*.mp.                                                                                                                                                                                                                                                                                                                                                                                                                                                                                                                                                                                                                                                                                                                                                                                                                                                                                                                                                                                                                                                                                                                                                                                                                                                                                                                                      |
| 20 | blood clot lysis/ or clot*.mp. or blood clot/ or blood clot retraction/                                                                                                                                                                                                                                                                                                                                                                                                                                                                                                                                                                                                                                                                                                                                                                                                                                                                                                                                                                                                                                                                                                                                                                                                                                                                        |
| 21 | thrombin/ or thrombosis/                                                                                                                                                                                                                                                                                                                                                                                                                                                                                                                                                                                                                                                                                                                                                                                                                                                                                                                                                                                                                                                                                                                                                                                                                                                                                                                       |
| 22 | tumor necrosis factor alpha/ or interleukin 6/ or cytokine/ or endogenous compound/ or cytokin*.mp. or alpha interferon/ or cytokinesis/                                                                                                                                                                                                                                                                                                                                                                                                                                                                                                                                                                                                                                                                                                                                                                                                                                                                                                                                                                                                                                                                                                                                                                                                       |
| 23 | chemotaxis/ or chemokinesis/ or chemokine/ or chemokin*.mp.                                                                                                                                                                                                                                                                                                                                                                                                                                                                                                                                                                                                                                                                                                                                                                                                                                                                                                                                                                                                                                                                                                                                                                                                                                                                                    |
| 24 | interleukin.mp. or cytokine/                                                                                                                                                                                                                                                                                                                                                                                                                                                                                                                                                                                                                                                                                                                                                                                                                                                                                                                                                                                                                                                                                                                                                                                                                                                                                                                   |
| 25 | (Interleukin?1* or il?1* or Il1* or Interleukin?2* or il?2* or Il2* or Interleukin?3* or il?3* or Il3* or Interleukin?4* or il?4* or Il4* or Interleukin?5* or il?5* or Il5* or Interleukin?6* or il?6* or Il6* or Interleukin?7* or il?7* or Il7* or Interleukin?8* or il?8* or Il8* or CXCL8 or Interleukin?9* or il?9* or Il9* or Interleukin?9*).mp. [mp=title, abstract, heading word, drug trade name, original title, device manufacturer, drug manufacturer, device trade name, keyword, floating subheading word, candidate term word]                                                                                                                                                                                                                                                                                                                                                                                                                                                                                                                                                                                                                                                                                                                                                                                                |
| 26 | (Msr1 or Cybb or Lgals3bp or Cst7 or Tlr2 or Nme1 or Rps5 or Ssr4 or P2ry13 or Col27a1 or Elmo1 or Numb or Slc2a5 or Cd244 or Spp1 or Liltrb4 or Hcar2 or Fxyd5 or Il1b or MS4A6A or Gpr65 or Tnf or Srgn or Ifi30 or Cxcl10 or Cd72 or Tspo or Il2rg or Gpr84 or Emp3 or Plaur or Tagln2 or Id2 or Sdc3 or Dab2 or Man2a1 or Psat1 or Map3k8 or Ctstl or Mthfd2 or Cxcl16 or Cd74 or Ctsc or Rnf149 or Smim3 or Cpd or HLA-E or Glrx or Adam9 or Galns or C3ar1 or Atp1a1 or Slamf9 or LILRB4 or Sall1 or Rab31 or Clasp2 or Arap3 or Tln2 or Gpr56 or Il7r or P2ry12 or Slc39a14 or Csm3 or FCGR3A or Ifit1 or Rpl32 or Rps26 or Iqgap1 or Socs3 or Gbp2 or HLA-DOB or Sult1a1 or Tgfb1 or Naaa or Plxdc2 or Nuak2 or B4galnt1 or Hmox1 or Ier3 or Ccl2 or CCL13 or St6gal1 or Mgl1 or Rtp4 or Manf or Klhdc8b or Sbn2 or Cd300lf or Capg or EIF1AX or Srgap2 or Gcnt2 or Ifngr1 or Il10ra or Kif21b or Upk1b or Atp8a2 or Nucb2 or Slc46a3 or Tppp or Klhl24 or Garnl3 or Sft2d2 or Flna or Rasgrp3 or Bank1 or Pcmdt2 or Pcmdt1 or Sbf2 or Cass4 or Slc9a9 or Milr1 or C19orf38 or Tlr12P or Aprt or C5ar1 or Cbfa2t3 or Ccr1 or Ctsh or Cx3cr1v Fkbp5 or Lpin1 or Hpgd or Il15rav IL4R or Lgals9 or Tmed1 or P2rx7 or Ptafr or Ccl7 or Sepp1 or Spint1 or Tnfrsf17 or Top3a or Gpr34 or Ip6k1 or Slc40a1 or Gpr35 or Zdhhc12 or Abhd11 or |

|    |                                                                                                                                                                                                                                                                                                                                                                                                                                                                                                                                                                                                                                                                                                                                                                                                                                                                                                                                                                                                                                                                                                                                                                                                                                                                                                                                                                                                                                                                                                                                                                                                                                                                                                                                                                                                                                                                                                                                                                                                   |
|----|---------------------------------------------------------------------------------------------------------------------------------------------------------------------------------------------------------------------------------------------------------------------------------------------------------------------------------------------------------------------------------------------------------------------------------------------------------------------------------------------------------------------------------------------------------------------------------------------------------------------------------------------------------------------------------------------------------------------------------------------------------------------------------------------------------------------------------------------------------------------------------------------------------------------------------------------------------------------------------------------------------------------------------------------------------------------------------------------------------------------------------------------------------------------------------------------------------------------------------------------------------------------------------------------------------------------------------------------------------------------------------------------------------------------------------------------------------------------------------------------------------------------------------------------------------------------------------------------------------------------------------------------------------------------------------------------------------------------------------------------------------------------------------------------------------------------------------------------------------------------------------------------------------------------------------------------------------------------------------------------------|
|    | MS4A6A or Smap2 or Rin2 or Snx29 or Atp13a2 or Ifitm2 or Maged2 or Trem2 or Ncln or Rcbtb2 or Ccdc86 or Rnf169 or Lpp or Dennd6a or A630033H20Rik or Arid5a or Ncap or Marf1 or Slc2a6 or Fcrl1 or Pilra or Gimap6 or ZNF705A or Rab6b or Eif5a or Tacc1 or Bend6 or Gmppb or Pilrb2).mp. [mp=title, abstract, heading word, drug trade name, original title, device manufacturer, drug manufacturer, device trade name, keyword, floating subheading word, candidate term word]                                                                                                                                                                                                                                                                                                                                                                                                                                                                                                                                                                                                                                                                                                                                                                                                                                                                                                                                                                                                                                                                                                                                                                                                                                                                                                                                                                                                                                                                                                                  |
| 27 | (HMOX1 or NQO1 or SLC7A11 or SRXN1 or GCLC or CAT or NFE2L2).mp. [mp=title, abstract, heading word, drug trade name, original title, device manufacturer, drug manufacturer, device trade name, keyword, floating subheading word, candidate term word]                                                                                                                                                                                                                                                                                                                                                                                                                                                                                                                                                                                                                                                                                                                                                                                                                                                                                                                                                                                                                                                                                                                                                                                                                                                                                                                                                                                                                                                                                                                                                                                                                                                                                                                                           |
| 28 | (LCN2 or STEAP4 or S1PR3 or TIMP1 or HSPB1 or CXCL10 or CD44 or OSMR or CP or SERPINA3 or ASPG or VIM or GFAP or C3 or HLA-E or SERPING1 or HLA-A or GBP2 or FBLN5 or FKBP5 or PSMB8 or SRGN or AMIGO2 or CLCF1 or TGM1 or PTX3 or S100A10 or SPHK1 or CD109 or PTGS2 or EMP1 or SLC10A6 or TM4SF1 or B3GNT5 or CD14).mp. [mp=title, abstract, heading word, drug trade name, original title, device manufacturer, drug manufacturer, device trade name, keyword, floating subheading word, candidate term word]                                                                                                                                                                                                                                                                                                                                                                                                                                                                                                                                                                                                                                                                                                                                                                                                                                                                                                                                                                                                                                                                                                                                                                                                                                                                                                                                                                                                                                                                                  |
| 29 | NF-kappa B/ or (NF-E2-Related Factor 2 or Nuclear factor erythroid 2-related factor 2 or NRF2).mp. or Heme oxygenase-1/ or HMGB1 protein/ or hirudins/ or (Argatroban or Nafamostat mesilate or Oxymatrine or TAK-242).mp.                                                                                                                                                                                                                                                                                                                                                                                                                                                                                                                                                                                                                                                                                                                                                                                                                                                                                                                                                                                                                                                                                                                                                                                                                                                                                                                                                                                                                                                                                                                                                                                                                                                                                                                                                                        |
| 30 | heme*.mp. or heme oxygenase/ or heme/ or heme oxygenase 1/                                                                                                                                                                                                                                                                                                                                                                                                                                                                                                                                                                                                                                                                                                                                                                                                                                                                                                                                                                                                                                                                                                                                                                                                                                                                                                                                                                                                                                                                                                                                                                                                                                                                                                                                                                                                                                                                                                                                        |
| 31 | hemin.mp. or hemin/                                                                                                                                                                                                                                                                                                                                                                                                                                                                                                                                                                                                                                                                                                                                                                                                                                                                                                                                                                                                                                                                                                                                                                                                                                                                                                                                                                                                                                                                                                                                                                                                                                                                                                                                                                                                                                                                                                                                                                               |
| 32 | fibrin*.mp. or fibrin degradation product/ or fibrin/                                                                                                                                                                                                                                                                                                                                                                                                                                                                                                                                                                                                                                                                                                                                                                                                                                                                                                                                                                                                                                                                                                                                                                                                                                                                                                                                                                                                                                                                                                                                                                                                                                                                                                                                                                                                                                                                                                                                             |
| 33 | superoxide.mp. or superoxide/                                                                                                                                                                                                                                                                                                                                                                                                                                                                                                                                                                                                                                                                                                                                                                                                                                                                                                                                                                                                                                                                                                                                                                                                                                                                                                                                                                                                                                                                                                                                                                                                                                                                                                                                                                                                                                                                                                                                                                     |
| 34 | hydrogen peroxide.mp. or hydrogen peroxide/                                                                                                                                                                                                                                                                                                                                                                                                                                                                                                                                                                                                                                                                                                                                                                                                                                                                                                                                                                                                                                                                                                                                                                                                                                                                                                                                                                                                                                                                                                                                                                                                                                                                                                                                                                                                                                                                                                                                                       |
| 35 | H2O2.mp.                                                                                                                                                                                                                                                                                                                                                                                                                                                                                                                                                                                                                                                                                                                                                                                                                                                                                                                                                                                                                                                                                                                                                                                                                                                                                                                                                                                                                                                                                                                                                                                                                                                                                                                                                                                                                                                                                                                                                                                          |
| 36 | complement component C2a/ or complement component C2b/ or complement factor D/ or complement receptor antagonist/ or complement component C1r/ or complement membrane attack complex/ or complement activation/ or complement component C5a/ or complement/ or complement component C5a receptor/ or complement component C1/ or complement component C4b binding protein/ or complement component C6/ or complement system/ or complement inhibitor/ or classical complement pathway C3 C5 convertase/ or complement component C4d/ or complement component C8b/ or complement component C3d receptor/ or complement dependent cytotoxicity/ or complement component C4 binding protein/ or complement inhibition/ or complement component C3/ or complement component C2/ or complement component C3 receptor/ or complement component C3a/ or complement factor I/ or complement component C9/ or complement component C5 inhibitor/ or complement factor H/ or complement component C8/ or alternative complement pathway C3 C5 convertase/ or complement fixation/ or complement component C3c/ or complement.mp. or complement blood level/ or complement component C1q antibody/ or complement deposition/ or complement component C4b/ or complement alternative pathway/ or complement component C3b receptor/ or vaccinia virus complement control protein/ or complement component C1s inhibitor/ or complement component C3b/ or complement component C5/ or complement receptor/ or complement component C4/ or complement component C8a/ or complement component C1s/ or complement component C4a/ or complement factor/ or complement classical pathway/ or "complement component C5a [dearginine]" or complement component C3 inhibitor/ or complement component C3d/ or complement component C7/ or complement component C5b/ or complement component C5a receptor antagonist/ or complement receptor affecting agent/ or complement component C1q/ or complement fixation test/ |
| 37 | interferon.mp. or interferon/                                                                                                                                                                                                                                                                                                                                                                                                                                                                                                                                                                                                                                                                                                                                                                                                                                                                                                                                                                                                                                                                                                                                                                                                                                                                                                                                                                                                                                                                                                                                                                                                                                                                                                                                                                                                                                                                                                                                                                     |
| 38 | NF\$KB.mp.                                                                                                                                                                                                                                                                                                                                                                                                                                                                                                                                                                                                                                                                                                                                                                                                                                                                                                                                                                                                                                                                                                                                                                                                                                                                                                                                                                                                                                                                                                                                                                                                                                                                                                                                                                                                                                                                                                                                                                                        |
| 39 | tumor necrosis factor.mp.                                                                                                                                                                                                                                                                                                                                                                                                                                                                                                                                                                                                                                                                                                                                                                                                                                                                                                                                                                                                                                                                                                                                                                                                                                                                                                                                                                                                                                                                                                                                                                                                                                                                                                                                                                                                                                                                                                                                                                         |
| 40 | matrix metalloproteinase/ or matrix metalloproteinase inhibitor/ or metalloproteinase/ or matrix metalloprotease.mp. or collagenase/                                                                                                                                                                                                                                                                                                                                                                                                                                                                                                                                                                                                                                                                                                                                                                                                                                                                                                                                                                                                                                                                                                                                                                                                                                                                                                                                                                                                                                                                                                                                                                                                                                                                                                                                                                                                                                                              |
| 41 | MMP*.mp.                                                                                                                                                                                                                                                                                                                                                                                                                                                                                                                                                                                                                                                                                                                                                                                                                                                                                                                                                                                                                                                                                                                                                                                                                                                                                                                                                                                                                                                                                                                                                                                                                                                                                                                                                                                                                                                                                                                                                                                          |
| 42 | AQ\$4.mp. or aquaporin 4/                                                                                                                                                                                                                                                                                                                                                                                                                                                                                                                                                                                                                                                                                                                                                                                                                                                                                                                                                                                                                                                                                                                                                                                                                                                                                                                                                                                                                                                                                                                                                                                                                                                                                                                                                                                                                                                                                                                                                                         |
| 43 | aquaporin?4.mp.                                                                                                                                                                                                                                                                                                                                                                                                                                                                                                                                                                                                                                                                                                                                                                                                                                                                                                                                                                                                                                                                                                                                                                                                                                                                                                                                                                                                                                                                                                                                                                                                                                                                                                                                                                                                                                                                                                                                                                                   |
| 44 | NOS.mp.                                                                                                                                                                                                                                                                                                                                                                                                                                                                                                                                                                                                                                                                                                                                                                                                                                                                                                                                                                                                                                                                                                                                                                                                                                                                                                                                                                                                                                                                                                                                                                                                                                                                                                                                                                                                                                                                                                                                                                                           |
| 45 | nitric oxide synthase/                                                                                                                                                                                                                                                                                                                                                                                                                                                                                                                                                                                                                                                                                                                                                                                                                                                                                                                                                                                                                                                                                                                                                                                                                                                                                                                                                                                                                                                                                                                                                                                                                                                                                                                                                                                                                                                                                                                                                                            |
| 46 | caspase inhibitor/ or caspase 5/ or caspase 8 inhibitor/ or initiator caspase/ or caspase 12/ or caspase 11/ or caspase 6/ or caspase 10/ or caspase 14/ or caspase/ or caspase recruitment domain protein 4/ or apoptosis repressor with caspase recruitment domain/ or caspase 9 inhibitor/ or caspase.mp. or caspase 13/ or caspase recruitment domain signaling protein/ or caspase 8/ or caspase 2 inhibitor/ or caspase 3/ or caspase activated deoxyribonuclease/ or caspase recruitment domain protein 15/ or "second mitochondrial activator of caspase"/ or effector caspase/ or caspase 3 inhibitor/ or caspase 9/ or caspase 4/ or "caspase activation and recruitment domain"/ or caspase assay/ or caspase 2/ or caspase 7/                                                                                                                                                                                                                                                                                                                                                                                                                                                                                                                                                                                                                                                                                                                                                                                                                                                                                                                                                                                                                                                                                                                                                                                                                                                         |
| 47 | Damage associated molecular pattern.mp.                                                                                                                                                                                                                                                                                                                                                                                                                                                                                                                                                                                                                                                                                                                                                                                                                                                                                                                                                                                                                                                                                                                                                                                                                                                                                                                                                                                                                                                                                                                                                                                                                                                                                                                                                                                                                                                                                                                                                           |
| 48 | DAMP.mp.                                                                                                                                                                                                                                                                                                                                                                                                                                                                                                                                                                                                                                                                                                                                                                                                                                                                                                                                                                                                                                                                                                                                                                                                                                                                                                                                                                                                                                                                                                                                                                                                                                                                                                                                                                                                                                                                                                                                                                                          |
| 49 | pathogen associated molecular pattern/ or PAMP.mp.                                                                                                                                                                                                                                                                                                                                                                                                                                                                                                                                                                                                                                                                                                                                                                                                                                                                                                                                                                                                                                                                                                                                                                                                                                                                                                                                                                                                                                                                                                                                                                                                                                                                                                                                                                                                                                                                                                                                                |
| 50 | autophagy.mp. or autophagy/                                                                                                                                                                                                                                                                                                                                                                                                                                                                                                                                                                                                                                                                                                                                                                                                                                                                                                                                                                                                                                                                                                                                                                                                                                                                                                                                                                                                                                                                                                                                                                                                                                                                                                                                                                                                                                                                                                                                                                       |
| 51 | toll like receptor 4/ or toll\$like receptor.mp. or toll like receptor/                                                                                                                                                                                                                                                                                                                                                                                                                                                                                                                                                                                                                                                                                                                                                                                                                                                                                                                                                                                                                                                                                                                                                                                                                                                                                                                                                                                                                                                                                                                                                                                                                                                                                                                                                                                                                                                                                                                           |
| 52 | toll like receptor 2/                                                                                                                                                                                                                                                                                                                                                                                                                                                                                                                                                                                                                                                                                                                                                                                                                                                                                                                                                                                                                                                                                                                                                                                                                                                                                                                                                                                                                                                                                                                                                                                                                                                                                                                                                                                                                                                                                                                                                                             |
| 53 | inflammasome/ or inflammasone.mp.                                                                                                                                                                                                                                                                                                                                                                                                                                                                                                                                                                                                                                                                                                                                                                                                                                                                                                                                                                                                                                                                                                                                                                                                                                                                                                                                                                                                                                                                                                                                                                                                                                                                                                                                                                                                                                                                                                                                                                 |
| 54 | eicosanoid.mp. or icosanoid/                                                                                                                                                                                                                                                                                                                                                                                                                                                                                                                                                                                                                                                                                                                                                                                                                                                                                                                                                                                                                                                                                                                                                                                                                                                                                                                                                                                                                                                                                                                                                                                                                                                                                                                                                                                                                                                                                                                                                                      |
| 55 | leukotriene D4/ or leukotriene D4 derivative/ or leukotriene A4 hydrolase inhibitor/ or leukotriene A4 methyl ester/ or leukotriene B4/ or leukotriene A4 derivative/ or leukotriene receptor affecting agent/ or leukotriene A4 hydrolase/ or leukotriene B3/ or leukotriene/ or leukotriene E4/ or leukotriene receptor blocking agent/ or leukotriene receptor stimulating agent/ or leukotriene.mp. or "prostaglandin,thromboxane or leukotriene receptor affecting agents"/ or                                                                                                                                                                                                                                                                                                                                                                                                                                                                                                                                                                                                                                                                                                                                                                                                                                                                                                                                                                                                                                                                                                                                                                                                                                                                                                                                                                                                                                                                                                               |

|    |                                                                                                                                                                                                                                                                                                                                                                                                                                                                                                                                                                                                                                                                                                                                                                                                                                                                                                                                                                                                                                                                                                                                                                                                                                                                                                                                                                                                                                                                                                                                                                                                                                                                                                                                                                                                                                                                                        |
|----|----------------------------------------------------------------------------------------------------------------------------------------------------------------------------------------------------------------------------------------------------------------------------------------------------------------------------------------------------------------------------------------------------------------------------------------------------------------------------------------------------------------------------------------------------------------------------------------------------------------------------------------------------------------------------------------------------------------------------------------------------------------------------------------------------------------------------------------------------------------------------------------------------------------------------------------------------------------------------------------------------------------------------------------------------------------------------------------------------------------------------------------------------------------------------------------------------------------------------------------------------------------------------------------------------------------------------------------------------------------------------------------------------------------------------------------------------------------------------------------------------------------------------------------------------------------------------------------------------------------------------------------------------------------------------------------------------------------------------------------------------------------------------------------------------------------------------------------------------------------------------------------|
|    | leukotriene A4/ or leukotriene B4 receptor/ or leukotriene B5/ or leukotriene derivative/ or leukotriene receptor/ or leukotriene E4 derivative/ or leukotriene C4 derivative/ or leukotriene B4 receptor antagonist/ or leukotriene C4/ or leukotriene F4/ or leukotriene C4 synthase/ or leukotriene B4 derivative/ or leukotriene D4 receptor/                                                                                                                                                                                                                                                                                                                                                                                                                                                                                                                                                                                                                                                                                                                                                                                                                                                                                                                                                                                                                                                                                                                                                                                                                                                                                                                                                                                                                                                                                                                                      |
| 56 | prostaglandin F1 alpha/ or prostaglandin F2/ or prostaglandin blood level/ or prostaglandin E synthase 1/ or prostaglandin E receptor 2/ or prostaglandin D synthase/ or delta12 prostaglandin J2/ or prostaglandin/ or prostaglandin A/ or prostaglandin E3/ or prostaglandin synthesis/ or prostaglandin synthesis inhibition/ or prostaglandin E2 trometamol/ or prostaglandin E synthase/ or prostaglandin E receptor 1/ or prostaglandin E1 derivative/ or prostaglandin receptor/ or "prostaglandin,thromboxane or leukotriene receptor affecting agents"/ or prostaglandin B1 polymer/ or prostaglandin synthase/ or prostaglandin B/ or prostaglandin A2 isopropyl ester/ or prostaglandin B2/ or prostaglandin E receptor/ or prostaglandin F/ or prostaglandin endoperoxide/ or prostaglandin G/ or prostaglandin F2 alpha/ or prostaglandin G2/ or prostaglandin B1/ or prostaglandin receptor stimulating agent/ or prostaglandin D/ or 15 deoxy delta12,14 prostaglandin J2/ or prostaglandin urine level/ or prostaglandin derivative/ or prostaglandin J2/ or prostaglandin E2 derivative/ or prostaglandin E receptor 4/ or prostaglandin D2 derivative/ or prostaglandin metabolism/ or prostaglandin D2/ or prostaglandin H/ or prostaglandin E2/ or prostaglandin F2 alpha trometamol/ or prostaglandin H2/ or prostaglandin receptor blocking agent/ or prostaglandin F2 alpha isopropyl ester/ or prostaglandin synthase inhibitor/ or prostaglandin A1/ or prostaglandin E1/ or prostaglandin inhibitor/ or prostaglandin F3 alpha/ or prostaglandin E/ or prostaglandin B1 derivative/ or prostaglandin F2 alpha derivative/ or prostaglandin E2 methyl ester/ or prostaglandin I3/ or prostaglandin transporter/ or prostaglandin A2/ or prostaglandin release/ or prostaglandin.mp. or prostaglandin E receptor 3/ or prostaglandin receptor affecting agent/ |
| 57 | prostacyclin/                                                                                                                                                                                                                                                                                                                                                                                                                                                                                                                                                                                                                                                                                                                                                                                                                                                                                                                                                                                                                                                                                                                                                                                                                                                                                                                                                                                                                                                                                                                                                                                                                                                                                                                                                                                                                                                                          |
| 58 | ((brain\$ or cerebr\$ or cerebell\$ or intracerebr\$ or intracran\$ or parenchyma\$ or intraventricular or infratentorial or supratentorial or basal gang\$ or ganglion\$ or putaminal or putamen or posterior fossa or brain?stem or intra?axial or lobar or deep or thalam\$ or cortical or superficial or vertebrobasil\$ or front\$ or tempor\$ or pariet\$ or occipit\$) adj (haemorrhage\$ or hemorrhage\$ or haematoma\$ or hematoma\$ or bleed\$)).tw.                                                                                                                                                                                                                                                                                                                                                                                                                                                                                                                                                                                                                                                                                                                                                                                                                                                                                                                                                                                                                                                                                                                                                                                                                                                                                                                                                                                                                         |
| 59 | (h?emorrhag\$ adj (stroke\$ or cerebrovasc\$ or cerebr?vasc\$ or cerebral vasc\$ or brain vasc\$ or cva\$ or apoplex\$ or attack\$ or event\$ or insult\$)).tw.                                                                                                                                                                                                                                                                                                                                                                                                                                                                                                                                                                                                                                                                                                                                                                                                                                                                                                                                                                                                                                                                                                                                                                                                                                                                                                                                                                                                                                                                                                                                                                                                                                                                                                                        |
| 60 | basal ganglion hemorrhage/ or exp brain hematoma/ or exp brain hemorrhage/ or cerebral hemorrhage/                                                                                                                                                                                                                                                                                                                                                                                                                                                                                                                                                                                                                                                                                                                                                                                                                                                                                                                                                                                                                                                                                                                                                                                                                                                                                                                                                                                                                                                                                                                                                                                                                                                                                                                                                                                     |
| 61 | 58 or 59 or 60                                                                                                                                                                                                                                                                                                                                                                                                                                                                                                                                                                                                                                                                                                                                                                                                                                                                                                                                                                                                                                                                                                                                                                                                                                                                                                                                                                                                                                                                                                                                                                                                                                                                                                                                                                                                                                                                         |
| 62 | Receptors, Cell Surface/                                                                                                                                                                                                                                                                                                                                                                                                                                                                                                                                                                                                                                                                                                                                                                                                                                                                                                                                                                                                                                                                                                                                                                                                                                                                                                                                                                                                                                                                                                                                                                                                                                                                                                                                                                                                                                                               |
| 63 | (post\$mortem or biops* or autopsy or intra\$operative or patholog* or histopatholog*).mp. or immunohistochemistry/                                                                                                                                                                                                                                                                                                                                                                                                                                                                                                                                                                                                                                                                                                                                                                                                                                                                                                                                                                                                                                                                                                                                                                                                                                                                                                                                                                                                                                                                                                                                                                                                                                                                                                                                                                    |
| 64 | [BRAIN/en [Enzymology]]                                                                                                                                                                                                                                                                                                                                                                                                                                                                                                                                                                                                                                                                                                                                                                                                                                                                                                                                                                                                                                                                                                                                                                                                                                                                                                                                                                                                                                                                                                                                                                                                                                                                                                                                                                                                                                                                |
| 65 | 62 or 63 or 64                                                                                                                                                                                                                                                                                                                                                                                                                                                                                                                                                                                                                                                                                                                                                                                                                                                                                                                                                                                                                                                                                                                                                                                                                                                                                                                                                                                                                                                                                                                                                                                                                                                                                                                                                                                                                                                                         |
| 66 | 1 or 2 or 3 or 4 or 5 or 6 or 7 or 8 or 9 or 10 or 11 or 12 or 13 or 14 or 15 or 16 or 17 or 18 or 19 or 20 or 21 or 22 or 23 or 24 or 25 or 26 or 27 or 28 or 29 or 30 or 31 or 32 or 33 or 34 or 35 or 36 or 37 or 38 or 39 or 40 or 41 or 42 or 43 or 44 or 45 or 46 or 47 or 48 or 49 or 50 or 51 or 52 or 53 or 54 or 55 or 56 or 57                                                                                                                                                                                                                                                                                                                                                                                                                                                                                                                                                                                                                                                                                                                                                                                                                                                                                                                                                                                                                                                                                                                                                                                                                                                                                                                                                                                                                                                                                                                                              |
| 67 | (t?cell or t?lymphocyt* or t-cell).mp. or T lymphocyte/                                                                                                                                                                                                                                                                                                                                                                                                                                                                                                                                                                                                                                                                                                                                                                                                                                                                                                                                                                                                                                                                                                                                                                                                                                                                                                                                                                                                                                                                                                                                                                                                                                                                                                                                                                                                                                |
| 68 | 66 or 67                                                                                                                                                                                                                                                                                                                                                                                                                                                                                                                                                                                                                                                                                                                                                                                                                                                                                                                                                                                                                                                                                                                                                                                                                                                                                                                                                                                                                                                                                                                                                                                                                                                                                                                                                                                                                                                                               |
| 69 | 61 and 65 and 68                                                                                                                                                                                                                                                                                                                                                                                                                                                                                                                                                                                                                                                                                                                                                                                                                                                                                                                                                                                                                                                                                                                                                                                                                                                                                                                                                                                                                                                                                                                                                                                                                                                                                                                                                                                                                                                                       |
| 70 | exp animals/ not humans/                                                                                                                                                                                                                                                                                                                                                                                                                                                                                                                                                                                                                                                                                                                                                                                                                                                                                                                                                                                                                                                                                                                                                                                                                                                                                                                                                                                                                                                                                                                                                                                                                                                                                                                                                                                                                                                               |
| 71 | 69 not 70                                                                                                                                                                                                                                                                                                                                                                                                                                                                                                                                                                                                                                                                                                                                                                                                                                                                                                                                                                                                                                                                                                                                                                                                                                                                                                                                                                                                                                                                                                                                                                                                                                                                                                                                                                                                                                                                              |

**Supplementary table 2: Data extraction items**

| <b>Identification</b>                                                                       |
|---------------------------------------------------------------------------------------------|
| Author's name                                                                               |
| Institution                                                                                 |
| Email                                                                                       |
| Address                                                                                     |
| Year of Publication                                                                         |
| Title                                                                                       |
| Sponsorship source                                                                          |
| Country                                                                                     |
| Setting                                                                                     |
| Comments                                                                                    |
|                                                                                             |
| <b>Methods</b>                                                                              |
| Design (case series, case control)                                                          |
| Blinding                                                                                    |
| Comparator disease condition                                                                |
| Comparator group (internal control, external control, uncontrolled, can't tell)             |
| Method for radiological measurement of ICH volume (manual, semiautomated, fully automated)  |
| Method for radiological measurement of PHO volume (manual, semiautomated, fully automated)  |
| Primary outcome                                                                             |
| Other relevant outcomes                                                                     |
| Principal tissue analysis methods used (frozen, fixed, cell suspension, IHC, IF, qPCR, etc) |
|                                                                                             |
| <b>Population</b>                                                                           |
| inclusion criteria                                                                          |
| Exclusion criteria                                                                          |
| Group differences                                                                           |
| Inclusion period and mid-year of study                                                      |
|                                                                                             |
| <b>Baseline characteristics</b>                                                             |
| Characteristic                                                                              |
| Number of patients                                                                          |
| % male                                                                                      |
| Age range                                                                                   |
| Age mean +/- SD                                                                             |
| Age median +/- IQR                                                                          |
| Time from onset to tissue retrieval/death: range (specify units)                            |
| Time from onset to tissue retrieval mean +/- SD (specify units)                             |
| Time from onset to tissue retrieval median +/- IQR (specify units)                          |
| Time from death to post-mortem: range (hours, if applicable)                                |
| Time from death to post-mortem: mean +/- SD (hours, if applicable)                          |
| Time from death to post-mortem: Median +/- IQR (hours, if applicable)                       |
| Number of technical replicates per sample per analysis                                      |
| Ethnicity: n White                                                                          |
| Ethnicity: n Black                                                                          |
| Ethnicity: n East Asian                                                                     |
| Ethnicity: n Indian                                                                         |
| Ethnicity: n Arab                                                                           |
| Ethnicity: n Hispanic                                                                       |
| Ethnicity: n mixed                                                                          |
| Ethnicity: n other                                                                          |
| Number of patients using immunomodulatory drugs                                             |
|                                                                                             |
| <b>Interventions</b>                                                                        |
| Characteristic                                                                              |
| Diagnostic investigation for ICH                                                            |

|                                                                                                                                                                                           |
|-------------------------------------------------------------------------------------------------------------------------------------------------------------------------------------------|
| Ancillary investigations to rule out secondary cause                                                                                                                                      |
| Tissue source (post-mortem/biopsy/other)                                                                                                                                                  |
| PHO volumes range                                                                                                                                                                         |
| PHO volume mean +/- SD                                                                                                                                                                    |
| PHO volume median +/- IQR                                                                                                                                                                 |
| ICH volumes range                                                                                                                                                                         |
| ICH volumes mean +/-SD                                                                                                                                                                    |
| ICH volumes median +/- IQR                                                                                                                                                                |
| SVD diagnosis numbers per group                                                                                                                                                           |
| SVD severity summary measures per group                                                                                                                                                   |
| Unclear location of ICH                                                                                                                                                                   |
| Lobar location of ICH                                                                                                                                                                     |
| Deep location of ICH                                                                                                                                                                      |
| Cerebellar location of ICH                                                                                                                                                                |
| Mixed infratentorial location of ICH                                                                                                                                                      |
| mixed supratentorial location of ICH                                                                                                                                                      |
| CAA cases per group: number diagnosed                                                                                                                                                     |
| Summary CAA severity measure per group                                                                                                                                                    |
| Intraventricular haemorrhage present on initial CT imaging: specify numbers where "yes"                                                                                                   |
| Hydrocephalus present on initial CT imaging: specify numbers where "yes"                                                                                                                  |
| Cardiovascular comorbidity prior to presentation (specify number of patients per condition)                                                                                               |
| Number of cases with cause of death other than ICH. Specific number per cause of death                                                                                                    |
| Number of cases with intervening brain illness between ICH and tissue sampling. Specify numbers per condition                                                                             |
| ICH score: range                                                                                                                                                                          |
| ICH score mean +/- SD                                                                                                                                                                     |
| ICH score median: +/- IQR                                                                                                                                                                 |
| NIHSS score range                                                                                                                                                                         |
| NIHSS score mean +/- SD                                                                                                                                                                   |
| NIHSS score mean +/- IQR                                                                                                                                                                  |
| Brainstem location of ICH                                                                                                                                                                 |
| GCS: median +/- IQR                                                                                                                                                                       |
| GCS: Mean +/- SD                                                                                                                                                                          |
| GCS range                                                                                                                                                                                 |
| First ever ICH (n)                                                                                                                                                                        |
| Recurrent ICH (n)                                                                                                                                                                         |
|                                                                                                                                                                                           |
| <b>Outcome:</b>                                                                                                                                                                           |
| For each group, specify each outcome measure for each tissue type as a new line. Enter the data as a Mean +/- SD, Median +/- IQR or Range per group as well as numbers of cases per group |



**Supplementary table 3: Risk of bias assessment**

| <b>Risk of Bias</b>                                                                                             | <b>Point awarded if selected</b> |
|-----------------------------------------------------------------------------------------------------------------|----------------------------------|
| <b>Selection</b>                                                                                                |                                  |
| <b>1) Is case definition adequate?</b>                                                                          |                                  |
| a) Yes with independent validation                                                                              | 1                                |
| b) Yes, e.g. record linkage or based on self-reports                                                            | 0                                |
| c) no description                                                                                               | 0                                |
| <b>2) Representativeness of the cases</b>                                                                       |                                  |
| a) consecutive or obviously representative series of cases *                                                    | 1                                |
| b) potential for selection biases or not stated                                                                 | 0                                |
| <b>3) Selection of controls</b>                                                                                 |                                  |
| a) community controls*                                                                                          | 1                                |
| b) tissue from same person as case but distant to ICH*                                                          | 1                                |
| b) hospital controls                                                                                            | 0                                |
| c) no description                                                                                               | 0                                |
| <b>4) Definition of controls</b>                                                                                |                                  |
| a) no history of disease (endpoint)*                                                                            | 1                                |
| b) distant brain tissue                                                                                         | 0                                |
| c) no description of source/Other                                                                               | 0                                |
| <b>Comparability</b>                                                                                            |                                  |
| <b>1) comparability of cases and controls on the basis of design or analysis</b>                                |                                  |
| a) study controls for .... (Select the most important factor)*                                                  | 1                                |
| b) study controls for any additional factor *                                                                   | 1                                |
| <b>2) Were all tissues processed in the same manner?</b>                                                        |                                  |
| a) all tissues processed in the same manner with equal numbers of cases and controls per batch*                 | 1                                |
| b) tissues processed using the same technique but potential confounders affecting either case or control tissue | 0                                |
| c) tissue processing of cases and controls was different                                                        | 0                                |
| <b>Exposure</b>                                                                                                 |                                  |
| <b>1) same method of case ascertainment for cases and controls</b>                                              |                                  |
| a) yes*                                                                                                         | 1                                |
| b) no                                                                                                           | 0                                |
| c) unclear                                                                                                      | 0                                |
| <b>2) Were all cases and controls accounted for in all analyses</b>                                             |                                  |
| a) data from all cases and controls provided*                                                                   | 1                                |
| b) data missing but an explanation for missing data provided                                                    | 0                                |
| c) unclear if all data provided or data missing without explanation                                             | 0                                |

**Supplementary table 4: Characteristics of patients used to derive reference genome**

| ID | Age | Sex    | Death-autopsy interval (h) | RIN* | Neuropathological findings                                                     | Cause of death          |
|----|-----|--------|----------------------------|------|--------------------------------------------------------------------------------|-------------------------|
| 1  | 89  | female | 24                         | 6.1  | No abnormality detected                                                        | Cardiac failure         |
| 2  | 76  | female | 129.5                      | 7.3  | No abnormality detected                                                        | Ischaemic heart disease |
| 3  | 71  | female | 96                         | 6.6  | No abnormality detected                                                        | Ischaemic heart disease |
| 4  | 57  | male   | 64                         | 7.3  | Mild non-amyloid SVD                                                           | Ischaemic heart disease |
| 5  | 71  | female | 95                         | 5.8  | Mild non-amyloid SVD                                                           | Suffocation             |
| 6  | 72  | male   | 60                         | 6.3  | Mild non-amyloid SVD                                                           | Ischaemic heart disease |
| 7  | 73  | male   | 66                         | 5.9  | Moderate non-amyloid SVD, mild arteriolar A $\beta$ -CAA, Braak tangle stage I | Ischaemic heart disease |

\*RIN: RNA integrity number.

**Supplementary table 5: Characteristics of included studies.**

Control brain tissue from the same case as the ICH was termed *internal controls* and control tissue derived from unaffected individuals was termed *external controls*. † included in final meta-analysis dataset; PMI – death to post-mortem interval; IC – internal control; EC – external control; NS – not stated; NA – not applicable; \*mean±standard deviation; \*\*mean; \*\*\* range; external control – control tissue from a different patient to case; internal control – control tissue from same patient as case; h – hours; d – days

| Study              | Country / Ethnicity                                                     | Tissue source | Control type (IC/EC)                                                                                       | ICH location                       | Time from ICH onset to biopsy / death                                | Cases |              |        |       | Controls   |                   |              |       |
|--------------------|-------------------------------------------------------------------------|---------------|------------------------------------------------------------------------------------------------------------|------------------------------------|----------------------------------------------------------------------|-------|--------------|--------|-------|------------|-------------------|--------------|-------|
|                    |                                                                         |               |                                                                                                            |                                    |                                                                      | n     | Age in years | % Male | PMI   | n          | Age in years      | % Male       | PMI   |
| Bao 2011a[1]†      | China / NS                                                              | Biopsy        | Distant tissue from unclear hemisphere (IC)                                                                | NS                                 | NS                                                                   | 14    | NS           | NS     | NA    | 14         | NS                | NS           | NA    |
| Bao 2011b[2]†      | China / NS                                                              | Biopsy        | Tissue from middle cerebral gyrus of unclear hemisphere (IC)                                               | NS                                 | NS                                                                   | 31    | NS           | NS     | NA    | 31         | NS                | NS           | NA    |
| Camacho 2019[3]    | Spain / NS                                                              | Post-mortem   | Patients with cerebral amyloid angiopathy but no ICH (EC)                                                  | NS                                 | NS                                                                   | 7     | 83±6*        | 43     | 2-20h | 7          | 73±11*            | 43           | 2-20h |
| Carmichael 2008[4] | USA / ICH: 3 Caucasian, 1 Arab and 1 Hispanic ICH. Control: 5 Caucasian | Biopsy        | Non-anatomically matched post-mortem "healthy aged" brain tissue (EC)                                      | Lobar 4, deep 2                    | 18±7.5h*                                                             | 6     | 69±12*       | NS     | NA    | 5          | 79±3*             | NS           | 3±1h  |
| Chen 2008[5]†      | China / NS                                                              | Biopsy        | Distant tissue from unclear hemisphere (IC)                                                                | Lobar 3, deep 25, infratentorial 2 | <6h to >72h                                                          | 30    | 55**         | 70     | NA    | 7          | 56**              | 71           | NA    |
| Dahnovici 2011[6]  | Romania / NS                                                            | Post-mortem   | Contralateral tissue (IC)                                                                                  | NS                                 | NS                                                                   | 24    | 68-83        | NS     | NS    | 24         | 68-83             | NS           | NS    |
| Delgado 2008[7]    | Spain / NS                                                              | Post-mortem   | Contralateral tissue and tissue from patients with no ICH, inflammatory, or neurological disease (IC & EC) | NS                                 | 23±15h*                                                              | 6     | 79±6*        | 83     | <6h   | IC 6, EC 2 | IC 79±6, EC 73±9* | IC 83, EC 50 | <6h   |
| Di Napoli 2012[8]  | Romania / NS                                                            | Post-mortem   | Contralateral brain tissue and tissue from patients with no brain pathology (IC & EC)                      | NS                                 | 4-12h                                                                | 5     | 74±3*        | 0      | 4-8h  | IC 5, EC 2 | IC 74±3, EC 81±2* | IC 0, EC 50  | 4-8h  |
| Duan 2007[9]       | China / NS                                                              | Biopsy        | Contralateral brain tissue (IC)                                                                            | Lobar 21, deep 18                  | 112h**                                                               | 39    | 63**         | 44     | NA    | 39         | 63**              | 44           | NA    |
| Gang 2018[10]      | China / NS                                                              | Biopsy        | Brain tissue >1cm distant from ICH (IC)                                                                    | Supratentorial                     | 6 patients <6h, 6 patients 6-24h, 6 patients 24-27h, 6 patients >72h | 24    | 60±16*       | 67     | NA    | 24         | 60±16*            | 67           | NA    |
| Guo 2008[11]†      | China / NS                                                              | Biopsy        | Normal appearing tissue taken on surgical approach to haematoma (IC)                                       | Lobar 3, Deep 25, Cerebellar 2     | NS                                                                   | 30    | 55**         | 70     | NA    | 7          | NS                | NS           | NA    |

| Study                        | Country / Ethnicity | Tissue source                 | Control type (IC/EC)                                                                                                                         | ICH location                         | Time from ICH onset to biopsy / death                                 | Cases |                     |        |       | Controls        |                        |              |       |
|------------------------------|---------------------|-------------------------------|----------------------------------------------------------------------------------------------------------------------------------------------|--------------------------------------|-----------------------------------------------------------------------|-------|---------------------|--------|-------|-----------------|------------------------|--------------|-------|
|                              |                     |                               |                                                                                                                                              |                                      |                                                                       | n     | Age in years        | % Male | PMI   | n               | Age in years           | % Male       | PMI   |
| Hernandez-Guillamon 2012[12] | Spain / NS          | Post-mortem                   | Contralateral brain tissue and tissue from patients who died of cardiorenal failure, gastrointestinal haemorrhage or legionellosis (EC & IC) | Lobar 4, deep 5,                     | <4->96h                                                               | 9     | 83±8*               | 44     | <6h   | IC 9, EC 3      | IC 83±8, EC 72±10*     | IC 44, EC 33 | <6h   |
| Holfelder 2011[13]           | Germany / NS        | Post-mortem                   | Distant tissue from unclear location and tissue from "corresponding locations" of "unaffected brains" (EC & IC)                              | NS                                   | 225±285h*                                                             | 12    | 60±14*              | 58     | NS    | IC 12, EC 6     | IC 60±14, EC 50±21*    | IC 58, EC 50 | NS    |
| Itoh 1997[14]                | Japan / NS          | Post-mortem                   | Uncontrolled                                                                                                                                 | NS                                   | NS                                                                    | 15    | NS                  | NS     | NS    | 0               | NA                     | NA           | NA    |
| Jin, 2011[15]                | USA / NS            | Cases – biopsy; controls – NS | Unclear origin of control tissue (EC)                                                                                                        | Deep                                 | 2±1d*                                                                 | 5     | 58±10*              | 40     | NA    | 4               | NS                     | NS           | NS    |
| Ke 2007[16]                  | China / NS          | Biopsy                        | Uncontrolled                                                                                                                                 | Lobar 9, Deep 33                     | NS                                                                    | 42    | 60±1*               | 64     | NA    | 0               | NA                     | NA           | NA    |
| Li, 2010[17]                 | China / NS          | Post-mortem                   | Contralateral and distant ipsilateral brain tissue (IC)                                                                                      | Lobar 10, deep 22, infratentorial 12 | 2h-16d                                                                | 44    | 60**<br>Range 37-84 | 59     | <12h  | 44              | 60**<br>Range 37-84    | 59           | <12h  |
| Liu 2015[18]                 | China / NS          | Biopsy                        | Distant tissue >1cm from haematoma (IC)                                                                                                      | Lobar 8, Deep 19                     | 11 patients <6h, 8 patients 6-24h, 4 patients 24-72h, 4 patients >72h | 27    | 58±13*              | 67     | NA    | NS              | NS                     | NS           | NA    |
| Liu 2006[19]                 | China / NS          | Biopsy                        | Uncontrolled                                                                                                                                 | Deep                                 | 28±15*                                                                | 32    | 56±10*              | 66     | NA    | 0               | NA                     | NA           | NA    |
| Mantle 2001[20]†             | UK / NS             | Biopsy                        | Patients surgically treated for brain aneurysm or tumour (EC)                                                                                | NS                                   | NS                                                                    | 10    | NS                  | NS     | NA    | 6               | NS                     | NS           | NA    |
| McCarron 1997[21]            | UK / NS             | Post-mortem                   | Tissue from patients with no neuropathologic diagnosis (EC)                                                                                  | NS                                   | NS                                                                    | 37    | 71**                | 24     | NS    | 12              | 76**                   | 45           | NS    |
| Rosell 2011[22]†             | Spain / NS          | Post-mortem                   | Contralateral brain tissue (IC)                                                                                                              | NS                                   | 31±30h*                                                               | 8     | 80±11.0*            | 75     | 6±5h* | 8               | 80±11.0*               | 75           | 6±5h* |
| Rosell 2006[23]              | Spain / NS          | Post-mortem                   | Contralateral brain tissue and tissue from patients who died of non-inflammatory disease (EC & IC)                                           | NS                                   | 14±8h*                                                                | 8     | 79±8*               | 88     | 5±1h* | IC 8, EC 2      | IC 79±8, EC 73±9*      | IC 88, EC 50 | 5±1h* |
| Shen 2008[24]                | China / NS          | Biopsy                        | Uncontrolled                                                                                                                                 | Deep                                 | 2±1d*                                                                 | 5     | 58±10*              | 40     | NA    | 0               | NA                     | NA           | NA    |
| Shtaya 2019[25]              | UK / NS             | Post-mortem                   | Brain tissue distant to the ICH and "healthy control" brain tissue (EC & IC)                                                                 | Lobar 15, deep 12                    | Not stated for 8/27 cases. 0-12 days                                  | 27    | 63±20*              | 48     | NS    | IC 27, EC 16-18 | IC 63±20*, EC 26-60*** | IC 48, EC 68 | NS    |

| Study              | Country / Ethnicity | Tissue source                          | Control type (IC/EC)                                                                                       | ICH location                                                                             | Time from ICH onset to biopsy / death                                                   | Cases |              |        |      | Controls    |                     |               |      |
|--------------------|---------------------|----------------------------------------|------------------------------------------------------------------------------------------------------------|------------------------------------------------------------------------------------------|-----------------------------------------------------------------------------------------|-------|--------------|--------|------|-------------|---------------------|---------------|------|
|                    |                     |                                        |                                                                                                            |                                                                                          |                                                                                         | n     | Age in years | % Male | PMI  | n           | Age in years        | % Male        | PMI  |
| Tanskanen 2011[26] | Finland / NS        | Biopsy and post-mortem                 | Biopsy and post-mortem (EC & IC)                                                                           | NS                                                                                       | NS                                                                                      | NS    | NS           | NS     | NS   | NS          | NS                  | NS            | NS   |
| Vakulenko 1974[27] | Russia / NS         | Post-mortem                            | Contralateral brain tissue (IC)                                                                            | Supratentorial                                                                           | NS                                                                                      | 22    | 50-79        | 50     | NS   | 22          | 50-79               | 50            | NS   |
| Wang 2011a[28]     | China / NS          | Biopsy                                 | Distant tissue >1cm from haematoma (IC)                                                                    | Cases: Lobar 3, deep 25, cerebellar 2.<br>Controls: lobar 1, deep 5, cerebellar 1.       | 6 patients <6h, 7 patients 6-12h, 5 patients 12-24h, 6 patients 24-72h, 6 patients >72h | 30    | NS           | NS     | NA   | 7           | NS                  | NS            | NA   |
| Wang 2011b[29]†    | China / NS          | Biopsy                                 | Brain tissue from patients undergoing clipping of aneurysm (EC)                                            | Lobar                                                                                    | 16 patients 2-6h, 18 patients 7-48h, 13 patients 49-72h                                 | 46    | 59±11*       | 67     | NA   | 5           | 56±8*               | 60            | NA   |
| Wang 2004[30]†     | China / NS          | Post-mortem                            | Patients who died of causes other than ICH (EC)                                                            | NS                                                                                       | <24h                                                                                    | 44    | 59±13*       | 55     | NA   | 5           | NS                  | NS            | NS   |
| Wu 2019[31]†       | China / NS          | Biopsy                                 | Tissue adjacent to arteriovenous malformation without haemorrhage (EC)                                     | Deep                                                                                     | 15±5h*                                                                                  | 27    | 60±8*        | 59     | NA   | 25          | 50±9*               | 56            | NA   |
| Wu 2010[32]†       | China / NS          | Post-mortem                            | Contralateral brain tissue and brain tissue from patients who died of non-cerebrovascular causes (EC & IC) | Lobar 4, Deep 13, mixed supratentorial 1, mixed infratentorial 4, brainstem 5, unclear 3 | 43±55 h*                                                                                | 30    | 58±10*       | 67     | <24h | IC 30, EC 6 | IC 58±10, EC 49±15* | IC 67, EC 100 | <24h |
| Wu 2008[33]        | China / NS          | Post-mortem                            | Brain tissue from patients who died of non-cerebrovascular causes (EC)                                     | Lobar 4, Deep 13, mixed supratentorial 1, mixed infratentorial 4, brainstem 5, unclear 3 | 43±55 h*                                                                                | 30    | 58±10*       | 67     | <24h | EC 6        | EC 49±15*           | EC 100        | <24h |
| Wu 2006[34]†       | China / NS          | Cases biopsy, controls post-mortem     | "Normal control" brain tissue from coroner's office (EC)                                                   | NS                                                                                       | 33h*                                                                                    | 29    | 65**         | 55     | NA   | 6           | NS                  | NS            | <3h  |
| Yilmaz 2009[35]    | Germany / NS        | Cases Post-mortem, controls not stated | "Healthy tissue" of unspecified origin (EC)                                                                | NS                                                                                       | <4 weeks                                                                                | 12    | NS           | NS     | NS   | 11          | NS                  | NS            | NS   |
| Zhang 2019[36]†    | China / NS          | Biopsy                                 | Distant brain tissue obtained intraoperatively (IC)                                                        | Lobar 8, deep 20                                                                         | 7 patients <6h, 7 patients 6-24h, 7 patients 24-72h, 7 patients >72h                    | 28    | 56±15*       | 64     | NA   | 28          | 56±15*              | 64            | NA   |
| Zhang 2015[37]     | China / NS          | Biopsy                                 | Uncontrolled for ICH status                                                                                | Deep                                                                                     | 6-12h                                                                                   | 45    | 54±11*       | 64     | NA   | 0           | NA                  | NA            | NA   |

| Study            | Country / Ethnicity | Tissue source | Control type (IC/EC)                                                                                                                                                   | ICH location                                                                             | Time from ICH onset to biopsy / death                                                        | Cases |              |        |        | Controls |              |        |        |
|------------------|---------------------|---------------|------------------------------------------------------------------------------------------------------------------------------------------------------------------------|------------------------------------------------------------------------------------------|----------------------------------------------------------------------------------------------|-------|--------------|--------|--------|----------|--------------|--------|--------|
|                  |                     |               |                                                                                                                                                                        |                                                                                          |                                                                                              | n     | Age in years | % Male | PMI    | n        | Age in years | % Male | PMI    |
| Zhang 2014[38]†  | China / NS          | Biopsy        | 2 patients with intraventricular cyst of unclear aetiology, 5 patients with obstructive hydrocephalus of unclear aetiology, 1 patient with intraventricular meningioma | NS                                                                                       | 8 patients <6h, 14 patients 7-12h, 12 patients 13-24h, 8 patients 25-48h, 6h 49-96h, 5h >96h | 53    | 57**         | 62     | NA     | 8        | 54**         | 63     | NA     |
| Zhang 2010a[39]† | China / NS          | Biopsy        | Distant brain tissue from patients undergoing ICH surgery <6h from onset (IC)                                                                                          | NS                                                                                       | 10 patients <6h, 8 patients 6-12h, 7 patients 12-24h                                         | 25    | 52±15*       | 63     | NA     | 5        | 60±13        | NS     | NA     |
| Zhang 2010b[40]† | China / NS          | Post-mortem   | Brain tissue from patients with "other disease without cerebral ischaemia" (EC)                                                                                        | Lobar 4, deep 13, mixed supratentorial 1, brainstem 5, mixed infratentorial 4, unclear 3 | 43±55h                                                                                       | 30    | 58±10*       | 66     | NS     | 6        | 48.5±15*     | 100    | NS     |
| Zhang 2003[41]   | China / NS          | Post-mortem   | Brain tissue from patients without history of neurological disease (EC)                                                                                                | Lobar 1, deep 6, cerebellar 1                                                            | 1 patient <24h, 3 patients 24-72h, 4 patients >72h                                           | 8     | 64±13*       | 63     | 0.5-2d | 5        | 68±10*       | NS     | 0.5-2d |
| Zhang 2000[42]   | China / NS          | Post-mortem   | Brain tissue from patients who died of non-neurological disease (EC)                                                                                                   | Deep                                                                                     | NS                                                                                           | 7     | 70**         | 57     | 9-48h  | 6        | 69**         | 50     | NS     |
| Zhao 2018[43]    | Case series         | Biopsy        | Uncontrolled for ICH status                                                                                                                                            | NS                                                                                       | 1-7 days                                                                                     | 103   | 52±15*       | NS     | NA     | 0        | NA           | NA     | NA     |
| Zhu 2004[44]     | China / NS          | Biopsy        | Biopsy from "tissues in proximity to malformed cerebral veins" (EC)                                                                                                    | NS                                                                                       | 15 patients <6h, 12 patients 6-48h, 10 patients >48h                                         | 37    | 55**         | 46     | NA     | 9        | NS           | NS     | NA     |

**Supplementary table 6: Summary of findings.**

† included in final meta-analysis dataset; TUNEL – terminal deoxynucleotidyl transferase dUTP nick end labelling; ICH – intracerebral haemorrhage; IHC – immunohistochemistry; WB – western blot; RT-PCR – reverse transcription polymerase chain reaction; RT-qPCR – reverse transcription quantitative polymerase chain reaction; ELISA – enzyme-linked immunosorbent assay; mRNA – messenger ribonucleic acid; EM – electron microscopy; CAA – cerebral amyloid angiopathy

| Study              | Design                       | Tissue source | Control type                                                                                      | Analysis method                   | Molecules studied                                                                                                                                                                             | Narrative summary of relevant findings                                                                                                                             |
|--------------------|------------------------------|---------------|---------------------------------------------------------------------------------------------------|-----------------------------------|-----------------------------------------------------------------------------------------------------------------------------------------------------------------------------------------------|--------------------------------------------------------------------------------------------------------------------------------------------------------------------|
| Bao 2011a[1]†      | Self-controlled case-control | Biopsy        | Distant tissue from unclear hemisphere                                                            | IHC, WB, RT-PCR                   | TUNEL, tropomyosin receptor kinase A, pro-nerve growth factor, neurotrophin receptor p75, sortilin                                                                                            | Increased staining of TUNEL and all molecules except for tropomyosin receptor kinase A in ICH tissue. Neurotrophin receptor P75 and TUNEL staining were correlated |
| Bao 2011b[2]†      | Self-controlled case-control | Biopsy        | Tissue from middle cerebral gyrus of unclear hemisphere                                           | IHC                               | TUNEL, pro-nerve growth factor, neurotrophin receptor p75, sortilin                                                                                                                           | Increased staining of TUNEL and all molecules except for pro-nerve growth factor in ICH tissue.                                                                    |
| Camacho 2019[3]    | Case control                 | Post-mortem   | Patients with cerebral amyloid angiopathy but no ICH                                              | IHC, RT-PCR                       | Apolipoproteins E and J.                                                                                                                                                                      | Apolipoprotein E was increased in capillaries, meningeal and cortical arteries. Apolipoprotein J was measured in the parenchyma only and was not increased.        |
| Carmichael 2008[4] | Case control                 | Biopsy        | Non-anatomically matched post-mortem "healthy aged" brain tissue.                                 | Microarray                        | Various mRNA transcripts                                                                                                                                                                      | 624 differentially expressed genes after ICH. Proinflammatory and anti-inflammatory annotated gene networks upregulated.                                           |
| Chen 2008[5]†      | Self-controlled case-control | Biopsy        | Distant tissue from unclear hemisphere                                                            | IHC, RT-PCR                       | TUNEL, tumour necrosis factor $\alpha$ (IHC, RT-PCR), BCL2 Associated X Protein (IHC, RT-PCR), BCL2 Like 1 (IHC, RT-PCR), interleukin 1 $\beta$ (RT-PCR), interleukin 6 (RT-PCR)              | Tissue appeared most damaged at 24-72h post-ICH. All other molecular markers increased by 72h                                                                      |
| Dahnovici 2011[6]  | Self-controlled case-control | Post-mortem   | Contralateral tissue                                                                              | IHC                               | CD68                                                                                                                                                                                          | Increased parenchymal CD68 positive cells close to ICH.                                                                                                            |
| Delgado 2008[7]    | Case control                 | Post-mortem   | Contralateral tissue; and tissue from patients with no ICH, inflammatory, or neurological disease | IHC, WB                           | FAS receptor, FAS ligand                                                                                                                                                                      | Increased FAS receptor and FAS ligand close to ICH.                                                                                                                |
| Di Napoli 2012[8]  | Case control                 | Post-mortem   | Contralateral brain tissue and tissue from patients with no brain pathology                       | IHC                               | C reactive protein                                                                                                                                                                            | Increased C reactive protein staining in neurons, astrocytes and neuropil close to ICH                                                                             |
| Duan 2007[9]       | Self-controlled case-control | Biopsy        | Contralateral brain tissue                                                                        | IHC                               | Haem oxygenase 1, B-cell lymphoma 2 protein                                                                                                                                                   | Increased haem oxygenase 1 with peak at 17-30h after ICH. Increased B-cell lymphoma 2 protein with peak at 36-96h.                                                 |
| Gang 2018[10]      | Self-controlled case-control | Biopsy        | Brain tissue >1cm distant from ICH                                                                | IHC, WB, RT-qPCR, transmission EM | TUNEL, tumour necrosis factor $\alpha$ , caspase 3, toll-like receptor 4, Myeloid differentiation primary response protein 88, nuclear factor kappa-light-chain-enhancer of activated B cells | Features of apoptosis at <6h with electron microscopy. All studied molecules were upregulated and peak expression within 72h                                       |

| Study                        | Design                       | Tissue source                 | Control type                                                                                                                       | Analysis method                                                  | Molecules studied                                                                                                                                                           | Narrative summary of relevant findings                                                                                                                                                                                                                   |
|------------------------------|------------------------------|-------------------------------|------------------------------------------------------------------------------------------------------------------------------------|------------------------------------------------------------------|-----------------------------------------------------------------------------------------------------------------------------------------------------------------------------|----------------------------------------------------------------------------------------------------------------------------------------------------------------------------------------------------------------------------------------------------------|
| Guo 2008[11]†                | Self-controlled case-control | Biopsy                        | Normal appearing tissue taken on surgical approach to haematoma                                                                    | RT-PCR                                                           | Aquaporin 4                                                                                                                                                                 | Increased aquaporin 4 with peak at 12-24h                                                                                                                                                                                                                |
| Hernandez-Guillamon 2012[12] | Case control                 | Post-mortem                   | Contralateral brain tissue and tissue from patients who died of cardiorenal failure, gastrointestinal haemorrhage or legionellosis | 14C-Benzylamine breakdown assay, IHC, WB                         | Amine oxidase, copper containing 3, semicarbazide-sensitive amine oxidases                                                                                                  | Reduced amine oxidase expression and activity close to ICH. 4 ICH cases diagnosed with CAA                                                                                                                                                               |
| Holfelder 2011[13]           | Case control                 | Post-mortem                   | Distant tissue from unclear location and tissue from "corresponding locations" of "unaffected brains"                              | IHC                                                              | CD163                                                                                                                                                                       | Increased parenchymal CD163 stained cells close to ICH. No change in perivascular CD163 staining                                                                                                                                                         |
| Itoh 1997[14]                | Case series                  | Post-mortem                   | Uncontrolled                                                                                                                       | IHC                                                              | Cistatin C and vascular amyloid costaining                                                                                                                                  | 66% of all cases had cistatin C and vascular amyloid costaining. 11 cases diagnosed with CAA had 91% costaining, whilst those without CAA 0% showed costaining.                                                                                          |
| Jin, 2011[15]                | Case control                 | Cases – biopsy; controls – NS | Unclear origin of control tissue                                                                                                   | Fluorescence IHC, confocal microscopy                            | Neuroglobin                                                                                                                                                                 | Increased neuroglobin which was colocalised with neuronal nuclear antigen but not glial fibrillary acidic protein                                                                                                                                        |
| Ke 2007[16]                  | Case series                  | Biopsy                        | Uncontrolled                                                                                                                       | IHC                                                              | Matrix metalloproteinases 2 and 9.                                                                                                                                          | Detected markers in all tissues studied.                                                                                                                                                                                                                 |
| Li, 2010[17]                 | Self-controlled case-control | Post-mortem                   | Contralateral and distant ipsilateral brain tissue                                                                                 | IHC                                                              | Glial fibrillary acidic protein, non-phosphorylated neurofilament                                                                                                           | Histological features of apoptosis from 6h of ICH, less prominent in distant tissue. Increased glial fibrillary acidic protein and abnormal neurofilament close to ICH.                                                                                  |
| Liu 2015[18]                 | Self-controlled case-control | Biopsy                        | Distant tissue >1cm from haematoma                                                                                                 | Transmission EM, IHC, WB RT-PCR                                  | TUNEL, tumour necrosis factor $\alpha$ , interleukin 1, interleukin 10, haem oxygenase 1, CD163                                                                             | Increased staining of TUNEL increased abundance of all markers. Interleukin 10 peak at 6-24h then reduced staining relative to control from 24h to >72h trough. Neuronal necrosis and loss of organelles, partly recovered at >72h.                      |
| Liu 2006[19]                 | Case series                  | Biopsy                        | Uncontrolled                                                                                                                       | IHC                                                              | TUNEL, hypoxia inducible factor 1 $\alpha$                                                                                                                                  | For both markers, the number of positive cells increased with time from ICH.                                                                                                                                                                             |
| Mantle 2001[20]†             | Case control                 | Biopsy                        | Patient surgically treated for aneurysm or tumour                                                                                  | Eponymous undescribed techniques. GSH 420 colorimetric assay. WB | Tissue protein glutathione peroxidase, glutathione reductase, catalase, superoxide dismutase and total antioxidant activity. Total glutathione and tissue protein carbonyl. | None of the measured values in the ICH group were significantly different from control                                                                                                                                                                   |
| McCarron 1997[21]            | Case control                 | Post-mortem                   | Tissue from patients with no neuropathologic diagnosis                                                                             | IHC                                                              | Apolipoprotein E, cistatin C, human leucocyte antigen                                                                                                                       | Positive staining for all markers was more prevalent in the ICH cohort than controls.                                                                                                                                                                    |
| Rosell 2011[22]†             | Self-controlled case-control | Post-mortem                   | Contralateral brain tissue                                                                                                         | Microarray, RT-qPCR, ELISA                                       | Various mRNA transcripts. Interleukin 8 protein                                                                                                                             | 468 differentially expressed genes in perihaematoma tissue. Up regulated probes were associated with cytokines, chemokines, coagulation factors, cell growth and proliferation. Down regulated probes were associated with cell cycle and neurotrophins. |



| Study              | Design                       | Tissue source          | Control type                                                                                     | Analysis method                                         | Molecules studied                                                                                                                                                                                                                                                   | Narrative summary of relevant findings                                                                                                                                                                                                                                                                                                    |
|--------------------|------------------------------|------------------------|--------------------------------------------------------------------------------------------------|---------------------------------------------------------|---------------------------------------------------------------------------------------------------------------------------------------------------------------------------------------------------------------------------------------------------------------------|-------------------------------------------------------------------------------------------------------------------------------------------------------------------------------------------------------------------------------------------------------------------------------------------------------------------------------------------|
| Rosell 2006[23]    | Case control                 | Post-mortem            | Contralateral brain tissue and tissue from patients who died of non-inflammatory disease         | IHC, in situ and gelatin zymography                     | Pro-matrix metalloproteinases 2 and 9 and non-specific gelatinase                                                                                                                                                                                                   | Increased pro-matrix metalloproteinase and gelatinase activity particularly in glial cells. No significant change in pro-matrix metalloproteinase 2                                                                                                                                                                                       |
| Shen 2008[24]      | Case series                  | Biopsy                 | Uncontrolled                                                                                     | IHC                                                     | Glial fibrillary acidic protein, Ki-67, Minichromosome Maintenance Complex Component 2, proliferating cell nuclear antigen, cleaved caspase 3, doublecortin, $\beta$ tubulin, dihydropyrimidinase like 3, musashi-1, nestin, CD11b, amacrophage/granulocyte antigen | All markers present in ICH tissue, but not quantifiable.                                                                                                                                                                                                                                                                                  |
| Shtaya 2019[25]    | Case control                 | Post-mortem            | Brain tissue distant to the ICH and "Healthy control" brain tissue.                              | IHC                                                     | Ionised calcium binding adaptor molecule 1, CD3                                                                                                                                                                                                                     | Ionised calcium binding adaptor molecule 1 staining was increased at all time points after ICH compared with control, peaking at 5-12 days after ICH. Stained cells were of transitional, reactive, amoeboid and giant morphologies in ICH cases. Parenchymal CD3 positive cells were detectable in 3/27 cases but not in 16-18 controls. |
| Tanskanen 2011[26] | Case control                 | Biopsy and post-mortem | Biopsy and post-mortem                                                                           | IHC                                                     | Matrix metalloproteinases 1, 2, 7, 9, 19 and 26                                                                                                                                                                                                                     | Matrix metalloproteinase 2 present in ICH cases, whilst matrix metalloproteinase 1, 7 and 9 were not. Metalloproteinase 19 but not 26 was increased in ICH cases compared with control.                                                                                                                                                   |
| Vakulenko 1974[27] | Self-controlled case-control | Post-mortem            | Contralateral brain tissue                                                                       | Lipid fractionation, Schultz, Okamoto and Fagin testing | Cholestyramine, phospholipid, lecithin, sphingomyelin                                                                                                                                                                                                               | Increased cholestyramine in ICH. All lipid fractions reduced in ICH.                                                                                                                                                                                                                                                                      |
| Wang 2011a[28]     | Self-controlled case-control | Biopsy                 | Distant tissue >1cm from haematoma                                                               | IHC, RT-PCR                                             | TUNEL, redox factor-1, BCL2 Associated X Apoptosis Regulator                                                                                                                                                                                                        | Redox factor 1 reduced protein and mRNA maximally 24-72h after ICH. BCL2 Like 1 protein and mRNA increased maximally at 24-72h after ICH. TUNEL increased maximally at 24-72h                                                                                                                                                             |
| Wang 2011b[29]†    | Case control                 | Biopsy                 | Brain tissue from patients undergoing clipping of aneurysm                                       | IHC                                                     | TUNEL, nuclear factor kappa-light-chain-enhancer of activated B cells, interleukin 1b, Intercellular Adhesion Molecule 1                                                                                                                                            | All molecules increased in tissue from cases with ICH                                                                                                                                                                                                                                                                                     |
| Wang 2004[30]†     | Self-controlled case-control | Post-mortem            | Patients who died of other causes than ICH                                                       | IHC                                                     | Glial fibrillary acidic protein, cyclin D1                                                                                                                                                                                                                          | All molecules increased in tissue from cases with ICH                                                                                                                                                                                                                                                                                     |
| Wu 2019[31]†       | Case control                 | Biopsy                 | Tissue adjacent to arteriovenous malformation without haemorrhage                                | IHC, congo red staining, EM                             | Light chain 3, beclin-1, cathepsin D                                                                                                                                                                                                                                | EM demonstrated increased autophagic vesicles in ICH tissue and organelle loss. Staining of all markers was increased in ICH.                                                                                                                                                                                                             |
| Wu 2010[32]†       | Case control                 | Post-mortem            | Contralateral brain tissue and brain tissue from patients who died of non-cerebrovascular causes | IHC                                                     | Matrix metalloproteinase 9, nuclear factor kappa-light-chain-enhancer of activated B cells, chemokine C-X-C motif ligand 2                                                                                                                                          | Increased staining bilaterally for all markers in ICH tissue. More staining in perihematoma tissue than contralateral tissue                                                                                                                                                                                                              |

| Study            | Design                       | Tissue source                          | Control type                                                                                                                                                           | Analysis method                | Molecules studied                                                                                                                                               | Narrative summary of relevant findings                                                                                                                                                                                                                                           |
|------------------|------------------------------|----------------------------------------|------------------------------------------------------------------------------------------------------------------------------------------------------------------------|--------------------------------|-----------------------------------------------------------------------------------------------------------------------------------------------------------------|----------------------------------------------------------------------------------------------------------------------------------------------------------------------------------------------------------------------------------------------------------------------------------|
| Wu 2008[33]      | Case control                 | Post-mortem                            | Brain tissue from patients who died of non-cerebrovascular causes                                                                                                      | IHC, in situ RNA hybridisation | Serpin Family E Member 2 (protease nexin 1), thrombin, aquaporin 4                                                                                              | Increased expression of serpin family E member 2. No change in expression of thrombin or aquaporin 4 by immunohistochemistry. Unclear results by in situ RNA hybridisation.                                                                                                      |
| Wu 2006[34]†     | Case control                 | Cases biopsy, controls post-mortem     | "Normal control" brain tissue from coroner's office                                                                                                                    | IHC                            | B-cell lymphoma 2 protein, BCL2 Associated X Apoptosis Regulator, P53, caspase 3                                                                                | Increased staining of all markers                                                                                                                                                                                                                                                |
| Yilmaz 2009[35]  | Case control                 | Cases Post-mortem, controls not stated | "healthy tissue" of unspecified origin                                                                                                                                 | IHC                            | CD209, CD123, CD3, Human leukocyte antigen-DR                                                                                                                   | Increased staining of all markers measured                                                                                                                                                                                                                                       |
| Zhang 2019[36]†  | Self-controlled case-control | Biopsy                                 | Distant brain tissue obtained intraoperatively                                                                                                                         | IHC, RT-qPCR, WB               | tumour necrosis factor $\alpha$ , heme-oxygenase 1, interleukin 1 $\beta$                                                                                       | All markers increased from 6h measured by IHC and RT-qPCR. All markers increased at all time points by WB.                                                                                                                                                                       |
| Zhang 2015[37]   | Case series                  | Biopsy                                 | Uncontrolled for ICH status                                                                                                                                            | IHC                            | Nuclear factor kappa-light-chain-enhancer of activated B cells, glial fibrillary acidic protein, neuron-specific enolase                                        | Greater staining of nuclear factor kappa-light-chain-enhancer of activated B cells associated with poor outcome at 6 months post-ICH. Nuclear factor kappa-light-chain-enhancer of activated B cells costained with glial fibrillary acidic protein and neuron-specific enolase. |
| Zhang 2014[38]†  | Case control                 | Biopsy                                 | 2 patients with intraventricular cyst of unclear aetiology, 5 patients with obstructive hydrocephalus of unclear aetiology, 1 patient with intraventricular meningioma | IHC                            | TUNEL, nuclear factor kappa-light-chain-enhancer of activated B cells, glial fibrillary acidic protein, interleukin 1 $\beta$ , tumour necrosis factor $\alpha$ | Increased staining of all markers in ICH tissue                                                                                                                                                                                                                                  |
| Zhang 2010a[39]† | Self-controlled case-control | Biopsy                                 | Distant brain tissue from patients undergoing ICH surgery <6h from onset                                                                                               | IHC                            | TUNEL, matrix metalloproteinase, caspase 3                                                                                                                      | All markers increased at all time points. Most induced in the 6-12 and 12-24h groups                                                                                                                                                                                             |
| Zhang 2010b[40]† | Case control                 | Post-mortem                            | Brain tissue from patients with "other disease without cerebral ischaemia"                                                                                             | IHC, in situ RNA hybridisation | Thrombin, Serpin Family E Member 2, Coagulation Factor II Thrombin Receptor                                                                                     | Increased Serpin Family E Member 2 by in situ RNA hybridisation but not IHC. Increased thrombin and Coagulation Factor II Thrombin Receptor in ICH tissue.                                                                                                                       |
| Zhang 2003[41]   | Case control                 | Post-mortem                            | Brain tissue from patients without history of neurological disease                                                                                                     | IHC                            | Glial fibrillary acidic protein, endothelin 1                                                                                                                   | Both markers increased in ICH tissue                                                                                                                                                                                                                                             |
| Zhang 2000[42]   | Case control                 | Post-mortem                            | Patients who died of non-neurological disease                                                                                                                          | IHC                            | Glucose transporter 1                                                                                                                                           | Increased Glut-1 staining in endothelial cells peaked at 24h. Peaked at 72h in astrocytes                                                                                                                                                                                        |
| Zhao 2018[43]    | Case series                  | Biopsy                                 | Uncontrolled for ICH status                                                                                                                                            | IHC                            | Nuclear factor kappa-light-chain-enhancer of activated B cells                                                                                                  | Staining appeared "increased" on days 1, 3 and 7. Peak on day 3                                                                                                                                                                                                                  |
| Zhu 2004[44]     | Case control                 | Biopsy                                 | Biopsy from "tissues in proximity to malformed cerebral veins"                                                                                                         | IHC                            | TUNEL, hypoxia inducible factor 1 $\alpha$                                                                                                                      | All markers increased staining in ICH tissue                                                                                                                                                                                                                                     |

**Supplementary table 7: Risk of bias.**

Green shading indicates criteria where points were assigned

| Study              | Is case definition adequate? | Representativeness of the cases | Control population                                                       | Haemorrhage status of controls                                                  | Comparability of cases and controls on the basis of design or analysis                | Tissues processing and batch effects                                                        | Same method of case ascertainment for cases and controls | Were all cases and controls accounted for in all analyses? | Score: Max 9 |
|--------------------|------------------------------|---------------------------------|--------------------------------------------------------------------------|---------------------------------------------------------------------------------|---------------------------------------------------------------------------------------|---------------------------------------------------------------------------------------------|----------------------------------------------------------|------------------------------------------------------------|--------------|
| Bao 2011a[1]       | Yes: independent validation  | Potential for selection biases  | Tissue from same person as case but distant to ICH                       | Distant brain tissue                                                            | Controls for between-subjects effects but no anatomical matching                      | Same processing technique, batch effect possible                                            | Yes                                                      | Data missing                                               | 4            |
| Bao 2011b[2]       | Yes: independent validation  | Potential for selection biases  | Tissue from same person as case but distant to ICH                       | Distant brain tissue                                                            | Controls for between-subjects effects but no anatomical matching                      | Same processing technique, batch effect possible                                            | Yes                                                      | Yes                                                        | 5            |
| Camacho 2019[3]    | Yes: independent validation  | Potential for selection biases  | Hospital controls                                                        | Patients with no history of ICH                                                 | Controls for presence of cerebral amyloid angiopathy                                  | Same processing technique, batch effect possible                                            | Yes                                                      | Yes                                                        | 5            |
| Carmichael 2008[4] | Yes: independent validation  | Potential for selection biases  | Unclear population of origin                                             | Patients with no history of ICH                                                 | Age and anatomical matching                                                           | Different platforms. No batch effect identified                                             | No                                                       | Data missing but explanation provided                      | 3            |
| Chen 2008[5]       | Yes: independent validation  | Potential for selection biases  | Tissue from same person as case but distant to ICH                       | Distant brain tissue                                                            | Controls for between-subjects effects but no anatomical matching                      | Same processing technique, batch effect possible                                            | Unclear                                                  | Yes                                                        | 4            |
| Dahnovici 2011[6]  | Not described                | Potential for selection biases  | Tissue from same person as case but distant to ICH                       | Distant brain tissue                                                            | Controls for between-subjects effects. Anatomical matching                            | Same processing technique, batch effect possible                                            | Unclear                                                  | Unclear                                                    | 3            |
| Delgado 2008[7]    | Yes: independent validation  | Potential for selection biases  | Tissue from same person as case but distant to ICH and hospital controls | Patients with no history of ICH and distant brain tissue from patients with ICH | Controls for between subjects effects, anatomical matching and distant effects of ICH | All tissues processed in the same manner with equal numbers of cases and controls per batch | Unclear for non-ICH controls                             | Unclear                                                    | 6            |

| Study                        | Is case definition adequate?         | Representativeness of the cases | Control population                                                       | Haemorrhage status of controls                                                  | Comparability of cases and controls on the basis of design or analysis                      | Tissues processing and batch effects                                                        | Same method of case ascertainment for cases and controls | Were all cases and controls accounted for in all analyses? | Score: Max 9 |
|------------------------------|--------------------------------------|---------------------------------|--------------------------------------------------------------------------|---------------------------------------------------------------------------------|---------------------------------------------------------------------------------------------|---------------------------------------------------------------------------------------------|----------------------------------------------------------|------------------------------------------------------------|--------------|
| Di Napoli 2012[8]            | Yes: independent validation          | Potential for selection biases  | Tissue from same person as case but distant to ICH and hospital controls | Patients with no history of ICH and distant brain tissue from patients with ICH | No data on selection of control cases, cases with bilateral sampling or anatomical location | Same processing technique, batch effect possible                                            | Unclear for non-ICH controls                             | Yes                                                        | 4            |
| Duan 2007[9]                 | Yes: independent validation          | Potential for selection biases  | Tissue from same person as case but distant to ICH                       | Distant brain tissue                                                            | Controls for between subjects effects,                                                      | Same processing technique, batch effect possible                                            | Yes                                                      | Yes                                                        | 5            |
| Gang 2018[10]                | Yes: independent validation          | Potential for selection biases  | Tissue from same person as case but distant to ICH                       | Distant brain tissue                                                            | Controls for between-subjects effects but no anatomical matching                            | All tissues processed in the same manner with equal numbers of cases and controls per batch | Yes                                                      | Unclear                                                    | 5            |
| Guo 2008[11]                 | Yes: independent validation          | Potential for selection biases  | Tissue from same person as case but distant to ICH                       | Distant brain tissue                                                            | Controls for between-subjects effects but no anatomical matching                            | Same processing technique, batch effect possible                                            | Unclear                                                  | Yes                                                        | 4            |
| Hernandez-Guillamon 2012[12] | Yes: independent validation          | Potential for selection biases  | Tissue from same person as case but distant to ICH and hospital controls | Patients with no history of ICH and distant brain tissue from patients with ICH | Controls for between-subjects effects but no anatomical matching                            | Same processing technique, batch effect possible                                            | Unclear for non-ICH controls                             | Yes                                                        | 5            |
| Holfelder 2011[13]           | "Intracerebral bleeding" not defined | Potential for selection biases  | Tissue from same person as case but distant to ICH and hospital controls | Patients with no history of ICH and distant brain tissue from patients with ICH | Unmatched for age, some anatomical matching                                                 | Same processing technique, batch effect possible                                            | Unclear for non-ICH controls                             | Data missing but explanation provided                      | 3            |
| Jin, 2011[15]                | Yes: independent validation          | Potential for selection biases  | Not described                                                            | Not described                                                                   | Not described                                                                               | Same processing technique, batch effect possible                                            | Not described                                            | Unclear                                                    | 1            |
| Li, 2010[17]                 | Yes: independent validation          | Consecutive autopsy series      | Tissue from same person as case but distant to ICH                       | Distant brain tissue                                                            | Controls for between-subjects effects. Anatomical matching                                  | Yes                                                                                         | Yes                                                      | Unclear                                                    | 7            |

| Study              | Is case definition adequate? | Representativeness of the cases | Control population                                                        | Haemorrhage status of controls                                                  | Comparability of cases and controls on the basis of design or analysis | Tissues processing and batch effects             | Same method of case ascertainment for cases and controls | Were all cases and controls accounted for in all analyses? | Score: Max 9 |
|--------------------|------------------------------|---------------------------------|---------------------------------------------------------------------------|---------------------------------------------------------------------------------|------------------------------------------------------------------------|--------------------------------------------------|----------------------------------------------------------|------------------------------------------------------------|--------------|
| Liu 2015[18]       | Yes: independent validation  | Potential for selection biases  | Tissue from same person as case but distant to ICH                        | Distant brain tissue                                                            | Controls for between-subjects effects but no anatomical matching       | Same processing technique, batch effect possible | No                                                       | Yes                                                        | 4            |
| Mantle 2001[20]    | No description               | Potential for selection biases  | Hospital controls                                                         | Patients treated for aneurysm or undergoing tumour surgery.                     | No matching described                                                  | Same processing technique, batch effect possible | Unclear                                                  | Unclear                                                    | 0            |
| McCarron 1997[21]  | Yes: independent validation  | Potential for selection biases  | Community controls                                                        | Patients with no history of ICH                                                 | Age matching, controls for amyloid angiopathy                          | Same processing technique, batch effect possible | Unclear                                                  | Yes                                                        | 6            |
| Rosell 2011[22]    | Yes: independent validation  | Potential for selection biases  | Tissue from same person as case but distant to ICH                        | Distant brain tissue                                                            | Controls for between-subjects effects. Some anatomical matching        | Same processing technique, batch effect possible | Unclear                                                  | Yes                                                        | 5            |
| Rosell 2006[23]    | Yes: independent validation  | Potential for selection biases  | Tissue from same person as case but distant to ICH and community controls | Patients with no history of ICH and distant brain tissue from patients with ICH | Controls for between-subjects effects. Anatomical matching             | Same processing technique, batch effect possible | Yes                                                      | Yes                                                        | 7            |
| Shtaya 2019[25]    | Yes: independent validation  | Potential for selection biases  | Tissue from same person as case but distant to ICH and hospital controls  | Patients with no history of ICH and distant brain tissue from patients with ICH | Controls for between-subjects effects, age and anatomical matching     | Same processing technique, batch effect possible | Unclear                                                  | Unclear                                                    | 5            |
| Tanskanen 2011[26] | Yes: independent validation  | Potential for selection biases  | Hospital controls                                                         | Patients with no history of ICH                                                 | Control for CAA                                                        | Same processing technique, batch effect possible | Unclear                                                  | Unclear                                                    | 3            |
| Vakulenko 1974[27] | Yes: independent validation  | Potential for selection biases  | Tissue from same person as case but distant to ICH                        | Distant brain tissue                                                            | Controls for between-subjects effects but no anatomical matching       | Same processing technique, batch effect possible | Unclear                                                  | Yes                                                        | 4            |

| Study           | Is case definition adequate? | Representativeness of the cases | Control population                                                       | Haemorrhage status of controls                                                  | Comparability of cases and controls on the basis of design or analysis               | Tissues processing and batch effects             | Same method of case ascertainment for cases and controls | Were all cases and controls accounted for in all analyses? | Score: Max 9 |
|-----------------|------------------------------|---------------------------------|--------------------------------------------------------------------------|---------------------------------------------------------------------------------|--------------------------------------------------------------------------------------|--------------------------------------------------|----------------------------------------------------------|------------------------------------------------------------|--------------|
| Wang 2011a[28]  | Yes: independent validation  | Potential for selection biases  | Tissue from same person as case but distant to ICH                       | Distant brain tissue                                                            | Controls for between-subjects effects but no anatomical matching                     | Same processing technique, batch effect possible | No                                                       | Yes                                                        | 4            |
| Wang 2011b[29]  | Yes: independent validation  | Potential for selection biases  | Hospital controls                                                        | Patients with no history of ICH                                                 | Controls for shared risk factors for ICH and aneurysm formation. Age and sex matched | Same processing technique, batch effect possible | Unclear                                                  | Yes                                                        | 5            |
| Wang 2004[30]   | Yes: independent validation  | Potential for selection biases  | No description                                                           | Patients with no history of ICH                                                 | None                                                                                 | Same processing technique, batch effect possible | No                                                       | Yes                                                        | 3            |
| Wu 2019[31]     | Yes: independent validation  | Potential for selection biases  | Hospital controls                                                        | Patients with no history of ICH                                                 | Controls for age and tissue retrieval method                                         | Same processing technique, batch effect possible | Unclear                                                  | Yes                                                        | 5            |
| Wu 2010[32]     | No description               | Potential for selection biases  | Tissue from same person as case but distant to ICH and hospital controls | Patients with no history of ICH and distant brain tissue from patients with ICH | Controls for between-subjects effects and anatomical matching                        | Same processing technique, batch effect possible | Unclear                                                  | Yes                                                        | 5            |
| Wu 2008[33]     | No description               | Potential for selection biases  | Hospital controls                                                        | Patients with no history of ICH                                                 | Anatomical matching only                                                             | Same processing technique, batch effect possible | Unclear                                                  | Unclear                                                    | 2            |
| Wu 2006[34]     | Yes: independent validation  | Potential for selection biases  | Hospital controls                                                        | Patients with no history of ICH                                                 | None                                                                                 | Same processing technique, batch effect possible | No                                                       | Yes                                                        | 3            |
| Yilmaz 2009[35] | Yes: independent validation  | Potential for selection biases  | Healthy tissue of undescribed origin                                     | Patients with no history of ICH                                                 | Anatomical matching only                                                             | Same processing technique, batch effect possible | Unclear                                                  | Yes                                                        | 4            |

| Study           | Is case definition adequate? | Representativeness of the cases | Control population                                 | Haemorrhage status of controls  | Comparability of cases and controls on the basis of design or analysis | Tissues processing and batch effects             | Same method of case ascertainment for cases and controls | Were all cases and controls accounted for in all analyses? | Score: Max 9 |
|-----------------|------------------------------|---------------------------------|----------------------------------------------------|---------------------------------|------------------------------------------------------------------------|--------------------------------------------------|----------------------------------------------------------|------------------------------------------------------------|--------------|
| Zhang 2019[36]  | Yes: independent validation  | Potential for selection biases  | Tissue from same person as case but distant to ICH | Distant brain tissue            | Controls for between-subjects effects but no anatomical matching       | Same processing technique, batch effect possible | Yes                                                      | Unclear                                                    | 4            |
| Zhang 2014[38]  | Yes: independent validation  | Potential for selection biases  | Hospital controls                                  | Patients with no history of ICH | Age and sex matched                                                    | Same processing technique, batch effect possible | Unclear                                                  | Yes                                                        | 4            |
| Zhang 2010a[39] | Yes: independent validation  | Potential for selection biases  | Tissue from same person as case but distant to ICH | Distant brain tissue            | Controls for between-subjects effects but no anatomical matching       | Same processing technique, batch effect possible | Unclear                                                  | Yes                                                        | 4            |
| Zhang 2010b[40] | Yes: independent validation  | Potential for selection biases  | Hospital controls                                  | Patients with no history of ICH | Anatomical matching                                                    | Same processing technique, batch effect possible | Unclear                                                  | Yes                                                        | 4            |
| Zhang 2003[41]  | Yes: independent validation  | Potential for selection biases  | Healthy tissue of undescribed origin               | Patients with no history of ICH | Anatomical matching only                                               | Same processing technique, batch effect possible | Unclear                                                  | Yes                                                        | 4            |
| Zhang 2000[42]  | Yes: independent validation  | Potential for selection biases  | Hospital controls                                  | Patients with no history of ICH | None                                                                   | Same processing technique, batch effect possible | Yes                                                      | Yes                                                        | 4            |
| Zhu 2004[44]    | No description               | Potential for selection biases  | Hospital controls                                  | Unclear                         | Unclear                                                                | Same processing technique, batch effect possible | Unclear                                                  | Yes                                                        | 1            |

### Supplementary figure 1: Forest plot of pooled independent associations of interleukin-1 $\beta$ protein with ICH stratified by time from ICH onset to tissue retrieval.

A – tissue retrieved <6h; B – tissue retrieved >6h after ICH onset. Tissue analysed by immunohistochemistry. Studies of surgically resected tissue compared with healthy access tissue that was unaffected by ICH, retrieved at any time point (Zhang 2019[36]) or from controls undergoing surgery for non-haemorrhagic disease (Wang 2011b[29] and Zhang 2014[38]).

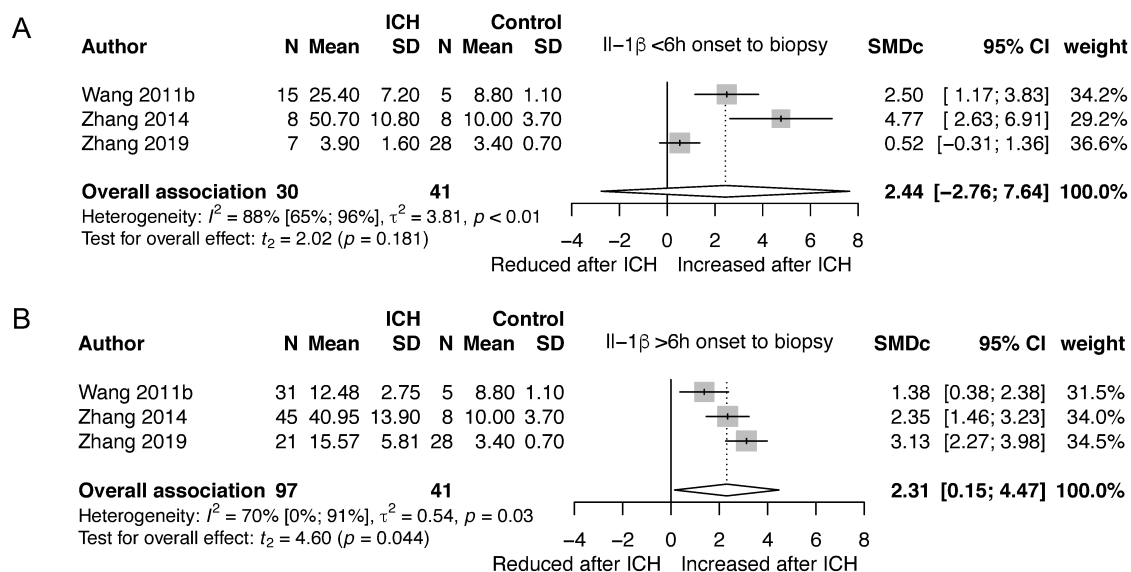



**Supplementary figure 2: Funnel plot of studies included in meta-analysis of associations of interleukin-1 $\beta$  with ICH.**

The symmetrical distribution indicates a low probability of publication bias.

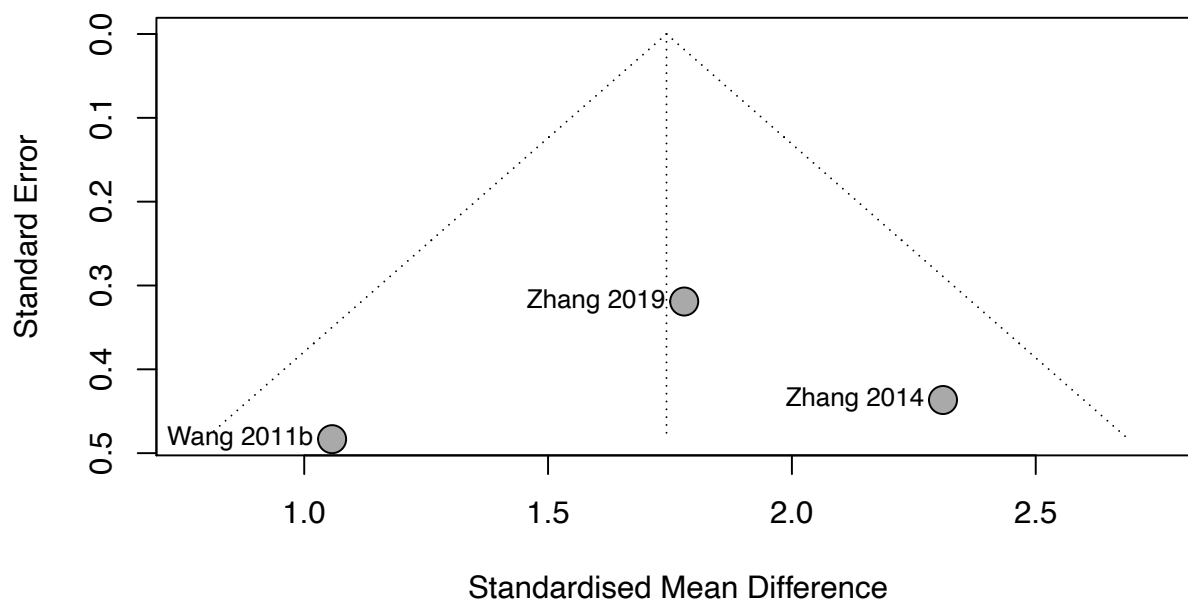

**Supplementary figure 3: Gene symbols contributing to enrichment of significantly enriched GO biological process terms.**

Gene symbols ranked by number of significantly enriched GO terms that are increased or decreased after ICH. GO term enrichment in sets of genes analysed by one, two or three studies.

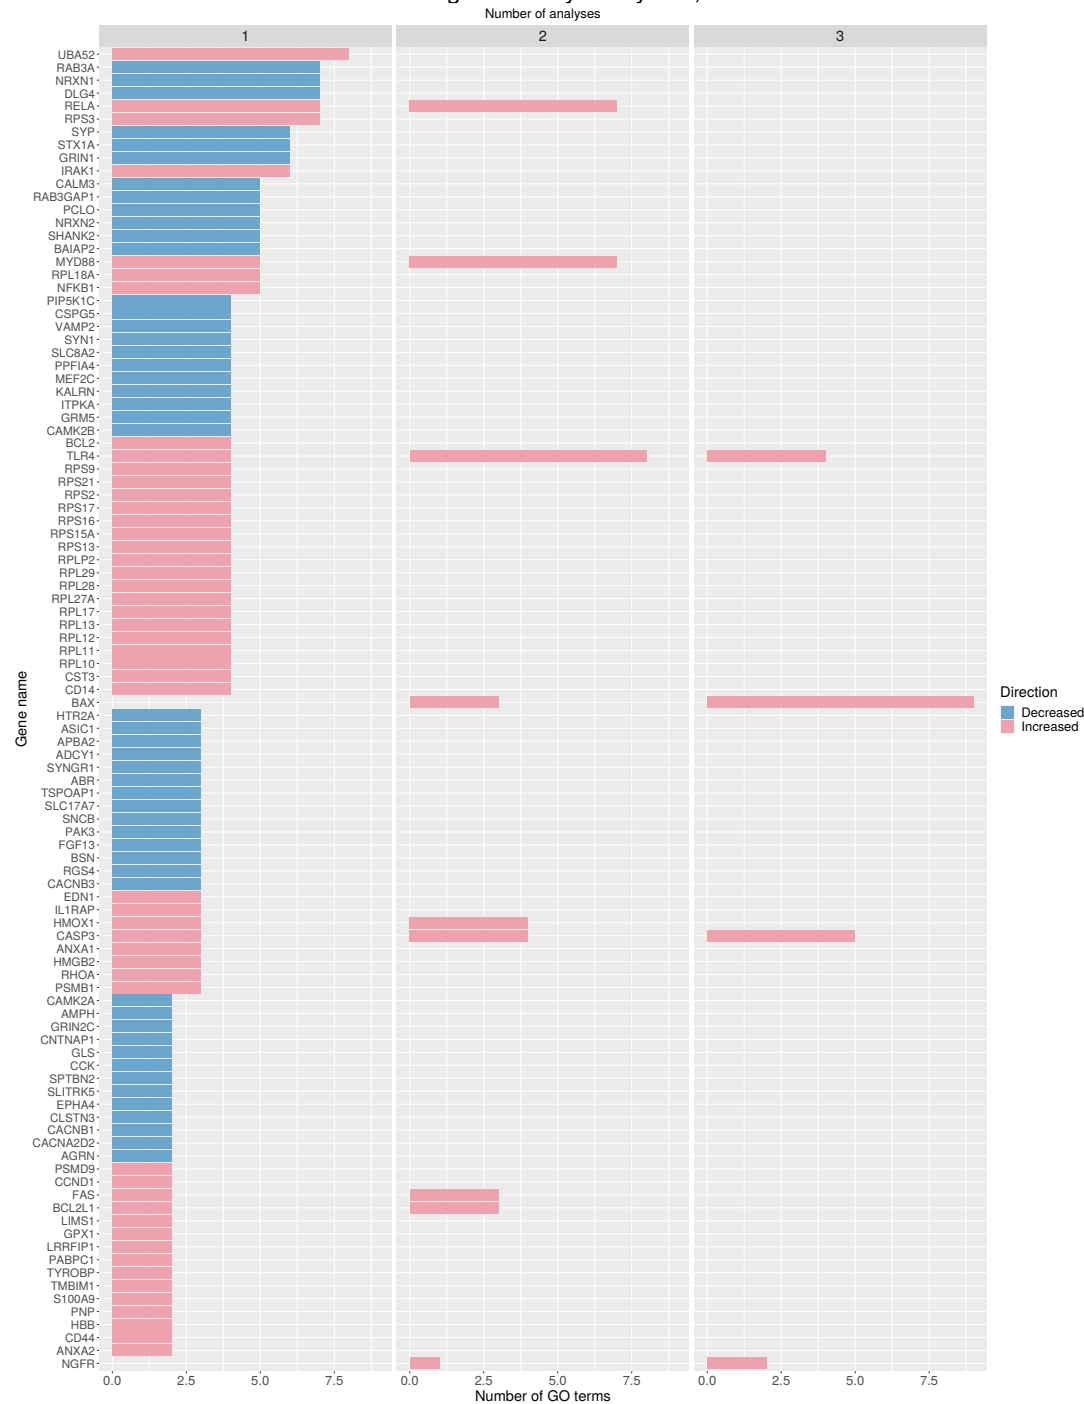

**Supplementary figure 4: Chord diagrams of significantly enriched GO terms.**

Segments indicate statistically significantly enriched GO terms at each level of replication (Fishers  $p < 0.05$ ). Chords indicate shared gene symbols. Chord width is weighted by study replication with larger chords connecting GO terms that are enriched in more highly replicated gene sets. Large groups of gene symbols drive specific enrichment of several GO terms derived from gene sets that are reduced (panel B) after ICH. No such pattern is seen in GO terms enriched in sets of genes that are increased after ICH (panel A). In this set, gene symbols contributing to enrichment of GO terms overlap considerably.

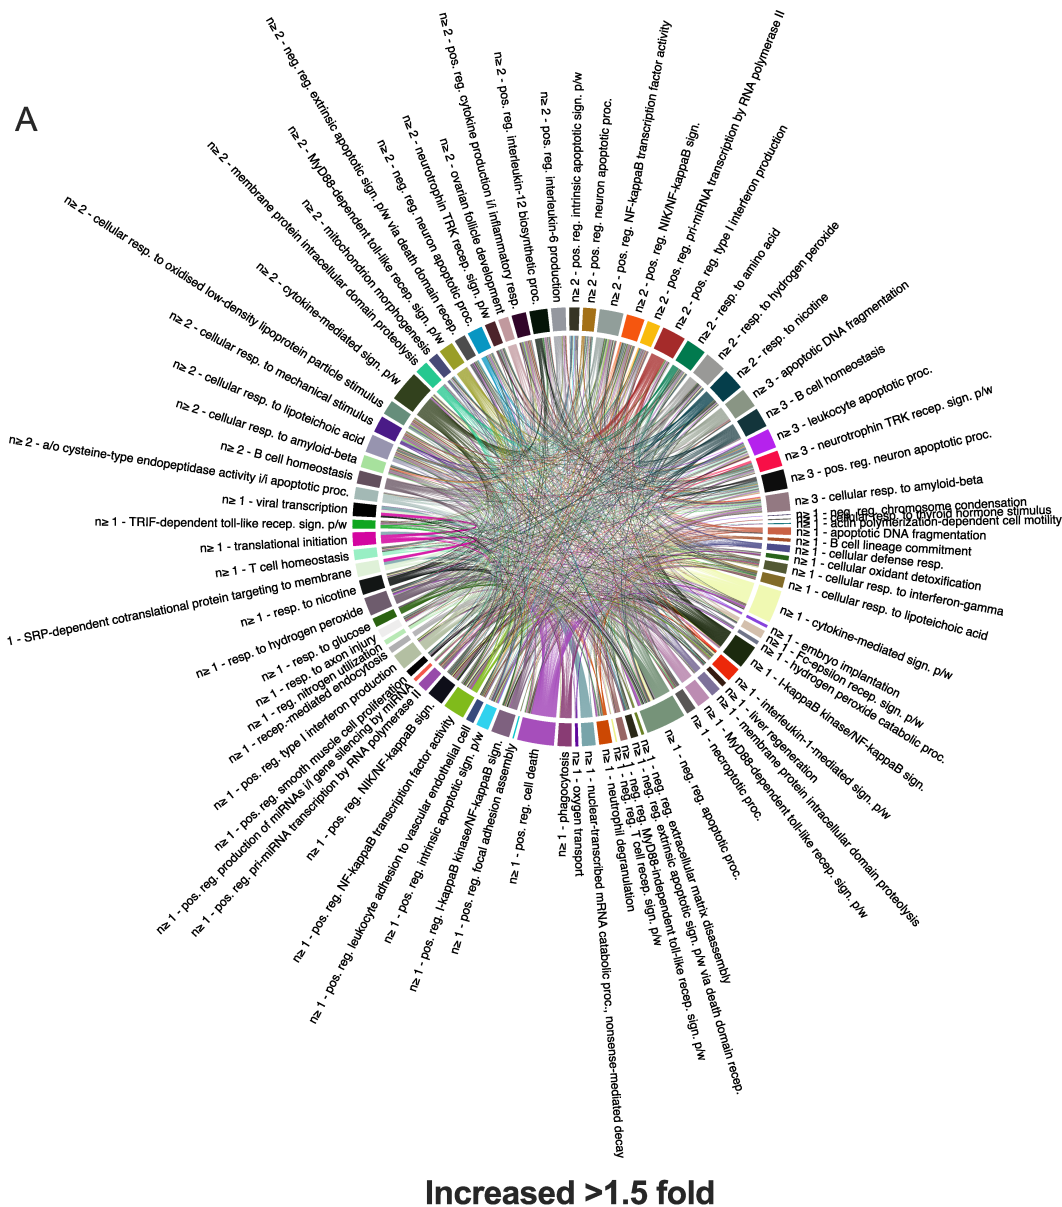

**B**

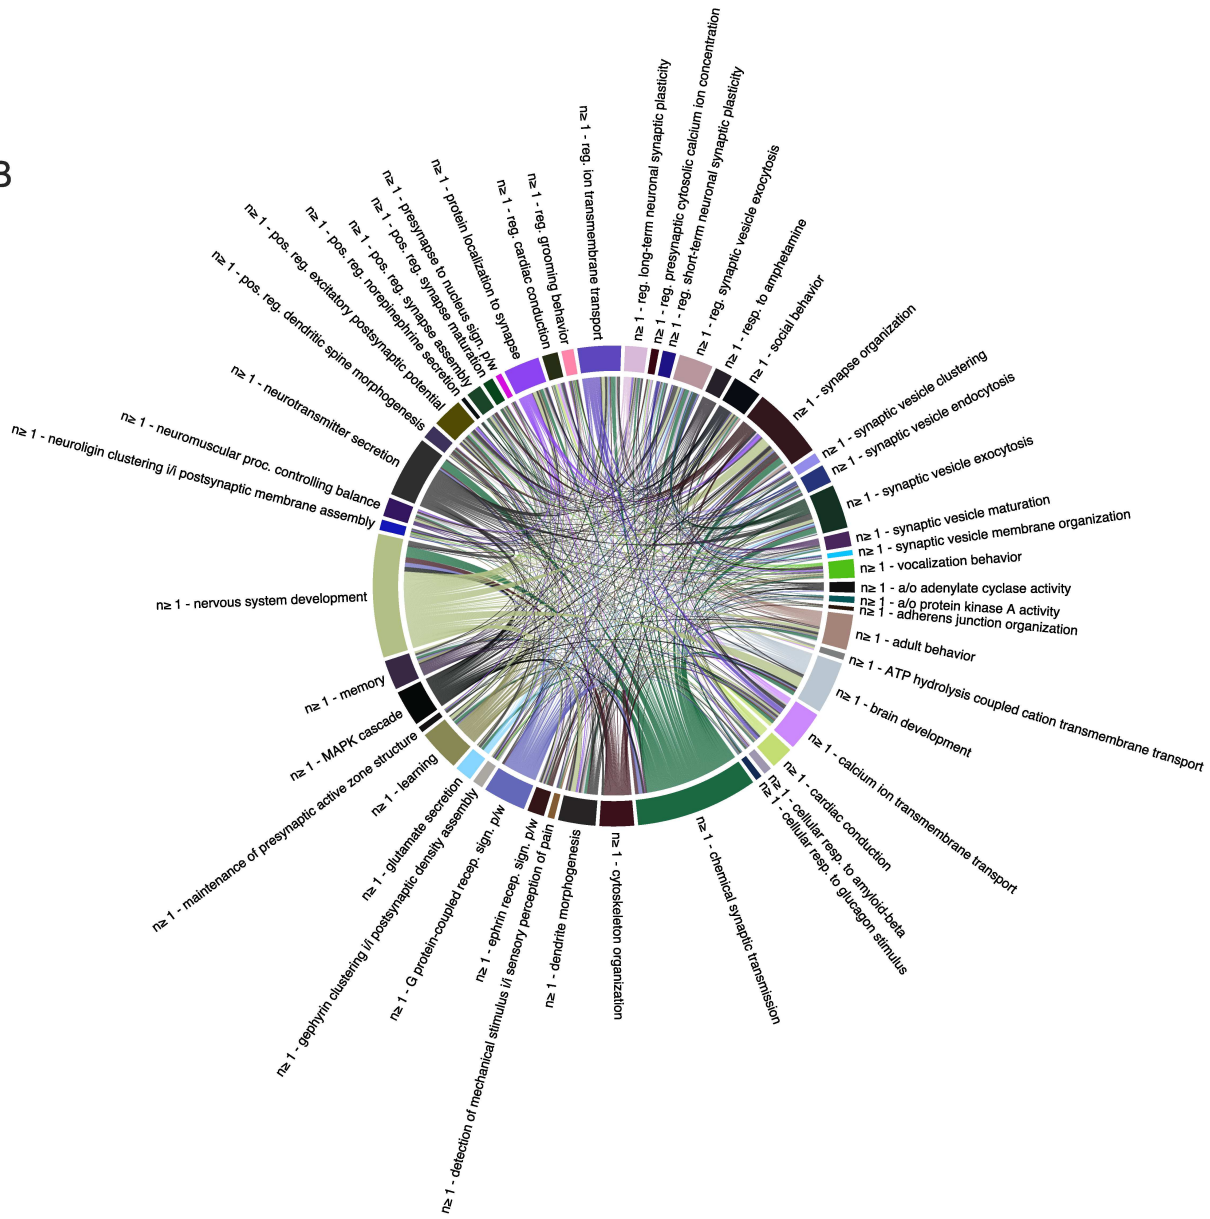

**Reduced >1.5 fold**

**Supplementary table 8: Enrichment table**

Enriched Gene Ontology: Biological Process terms in sets of genes that are increased or decreased after ICH. For each set, the 50 terms with the lowest p-value are displayed. Significantly enriched ( $p < 0.05$ ) terms with  $> 1$  gene found in the meta-analysis set are tabulated.

| GO ID                                                     | GO Term                                                                                 | Total annotated genes in background set (n) | Genes in meta-analysis set (n) | p-value (Fishers) |
|-----------------------------------------------------------|-----------------------------------------------------------------------------------------|---------------------------------------------|--------------------------------|-------------------|
| <b>Gene set: increased in <math>\geq 1</math> study</b>   |                                                                                         |                                             |                                |                   |
| GO:0043312                                                | neutrophil degranulation                                                                | 326                                         | 36                             | 7.20E-19          |
| GO:0006614                                                | SRP-dependent cotranslational protein targeting to membrane                             | 94                                          | 19                             | 3.10E-15          |
| GO:0000184                                                | nuclear-transcribed mRNA catabolic process, nonsense-mediated decay                     | 116                                         | 20                             | 8.30E-14          |
| GO:0006413                                                | translational initiation                                                                | 171                                         | 21                             | 3.00E-12          |
| GO:0019083                                                | viral transcription                                                                     | 167                                         | 19                             | 1.30E-10          |
| GO:0002755                                                | MyD88-dependent toll-like receptor signaling pathway                                    | 20                                          | 6                              | 9.80E-07          |
| GO:1902042                                                | negative regulation of extrinsic apoptotic signaling pathway via death domain receptors | 22                                          | 6                              | 1.80E-06          |
| GO:0051092                                                | positive regulation of NF-kappaB transcription factor activity                          | 101                                         | 11                             | 1.80E-06          |
| GO:1901224                                                | positive regulation of NIK/NF-kappaB signaling                                          | 45                                          | 8                              | 1.90E-06          |
| GO:0042542                                                | response to hydrogen peroxide                                                           | 102                                         | 11                             | 2.20E-06          |
| GO:0007566                                                | embryo implantation                                                                     | 32                                          | 8                              | 2.30E-06          |
| GO:0019221                                                | cytokine-mediated signaling pathway                                                     | 425                                         | 34                             | 9.30E-06          |
| GO:0048678                                                | response to axon injury                                                                 | 57                                          | 7                              | 1.20E-05          |
| GO:0043066                                                | negative regulation of apoptotic process                                                | 575                                         | 36                             | 1.20E-05          |
| GO:0032481                                                | positive regulation of type I interferon production                                     | 59                                          | 8                              | 1.80E-05          |
| GO:0070498                                                | interleukin-1-mediated signaling pathway                                                | 84                                          | 9                              | 1.90E-05          |
| GO:0002326                                                | B cell lineage commitment                                                               | 4                                           | 3                              | 2.30E-05          |
| GO:0097067                                                | cellular response to thyroid hormone stimulus                                           | 12                                          | 4                              | 4.50E-05          |
| GO:0034128                                                | negative regulation of MyD88-independent toll-like receptor signaling pathway           | 5                                           | 3                              | 5.60E-05          |
| GO:0070358                                                | actin polymerization-dependent cell motility                                            | 5                                           | 3                              | 5.60E-05          |
| GO:0042744                                                | hydrogen peroxide catabolic process                                                     | 13                                          | 4                              | 6.40E-05          |
| GO:2001244                                                | positive regulation of intrinsic apoptotic signaling pathway                            | 47                                          | 9                              | 6.40E-05          |
| GO:0070266                                                | necroptotic process                                                                     | 28                                          | 6                              | 6.90E-05          |
| GO:0071346                                                | cellular response to interferon-gamma                                                   | 96                                          | 11                             | 7.40E-05          |
| GO:0010942                                                | positive regulation of cell death                                                       | 481                                         | 29                             | 0.00011           |
| GO:0006968                                                | cellular defense response                                                               | 15                                          | 4                              | 0.00012           |
| GO:0006898                                                | receptor-mediated endocytosis                                                           | 165                                         | 9                              | 0.00013           |
| GO:0006309                                                | apoptotic DNA fragmentation                                                             | 17                                          | 4                              | 0.00019           |
| GO:0015671                                                | oxygen transport                                                                        | 7                                           | 3                              | 0.00019           |
| GO:0071223                                                | cellular response to lipoteichoic acid                                                  | 7                                           | 3                              | 0.00019           |
| GO:0006909                                                | phagocytosis                                                                            | 152                                         | 12                             | 0.00021           |
| GO:0038095                                                | Fc-epsilon receptor signaling pathway                                                   | 91                                          | 8                              | 0.00022           |
| GO:0031293                                                | membrane protein intracellular domain proteolysis                                       | 18                                          | 4                              | 0.00025           |
| GO:0007249                                                | I-kappaB kinase/NF-kappaB signaling                                                     | 183                                         | 13                             | 0.00028           |
| GO:1904996                                                | positive regulation of leukocyte adhesion to vascular endothelial cell                  | 8                                           | 3                              | 0.0003            |
| GO:0048661                                                | positive regulation of smooth muscle cell proliferation                                 | 55                                          | 7                              | 0.00031           |
| GO:0010716                                                | negative regulation of extracellular matrix disassembly                                 | 2                                           | 2                              | 0.00032           |
| GO:1902340                                                | negative regulation of chromosome condensation                                          | 2                                           | 2                              | 0.00032           |
| GO:0006808                                                | regulation of nitrogen utilization                                                      | 2                                           | 2                              | 0.00032           |
| GO:0035094                                                | response to nicotine                                                                    | 25                                          | 6                              | 0.00038           |
| GO:0043029                                                | T cell homeostasis                                                                      | 22                                          | 5                              | 0.00038           |
| GO:0097421                                                | liver regeneration                                                                      | 20                                          | 4                              | 0.00039           |
| GO:1903800                                                | positive regulation of production of miRNAs involved in gene silencing by miRNA         | 9                                           | 3                              | 0.00044           |
| GO:0043123                                                | positive regulation of I-kappaB kinase/NF-kappaB signaling                              | 129                                         | 9                              | 0.00052           |
| GO:0098869                                                | cellular oxidant detoxification                                                         | 57                                          | 6                              | 0.00053           |
| GO:0051894                                                | positive regulation of focal adhesion assembly                                          | 22                                          | 4                              | 0.00057           |
| GO:1902895                                                | positive regulation of pri-miRNA transcription by RNA polymerase II                     | 22                                          | 4                              | 0.00057           |
| GO:0035666                                                | TRIF-dependent toll-like receptor signaling pathway                                     | 22                                          | 4                              | 0.00057           |
| GO:0009749                                                | response to glucose                                                                     | 137                                         | 7                              | 0.0007            |
| GO:0050860                                                | negative regulation of T cell receptor signaling pathway                                | 11                                          | 3                              | 0.00085           |
| <b>Gene set: increased in <math>\geq 2</math> studies</b> |                                                                                         |                                             |                                |                   |

|                                          |                                                                                         |      |    |          |
|------------------------------------------|-----------------------------------------------------------------------------------------|------|----|----------|
| GO:1902042                               | negative regulation of extrinsic apoptotic signaling pathway via death domain receptors | 22   | 3  | 1.30E-06 |
| GO:0045084                               | positive regulation of interleukin-12 biosynthetic process                              | 3    | 2  | 3.00E-06 |
| GO:0043123                               | positive regulation of I-kappaB kinase/NF-kappaB signaling                              | 129  | 4  | 6.70E-06 |
| GO:0071260                               | cellular response to mechanical stimulus                                                | 54   | 3  | 2.10E-05 |
| GO:0071223                               | cellular response to lipoteichoic acid                                                  | 7    | 2  | 2.10E-05 |
| GO:0140052                               | cellular response to oxidised low-density lipoprotein particle stimulus                 | 7    | 2  | 2.10E-05 |
| GO:1900017                               | positive regulation of cytokine production involved in inflammatory response            | 10   | 2  | 4.50E-05 |
| GO:0051092                               | positive regulation of NF-kappaB transcription factor activity                          | 101  | 3  | 0.00013  |
| GO:0031293                               | membrane protein intracellular domain proteolysis                                       | 18   | 2  | 0.00015  |
| GO:0035094                               | response to nicotine                                                                    | 25   | 3  | 0.00015  |
| GO:0043524                               | negative regulation of neuron apoptotic process                                         | 108  | 3  | 0.00016  |
| GO:0001782                               | B cell homeostasis                                                                      | 19   | 2  | 0.00017  |
| GO:0002755                               | MyD88-dependent toll-like receptor signaling pathway                                    | 20   | 2  | 0.00019  |
| GO:0070584                               | mitochondrion morphogenesis                                                             | 20   | 2  | 0.00019  |
| GO:1902895                               | positive regulation of pri-miRNA transcription by RNA polymerase II                     | 22   | 2  | 0.00023  |
| GO:1904646                               | cellular response to amyloid-beta                                                       | 25   | 2  | 0.00029  |
| GO:0043200                               | response to amino acid                                                                  | 79   | 3  | 0.00031  |
| GO:0048011                               | neurotrophin TRK receptor signaling pathway                                             | 28   | 2  | 0.00037  |
| GO:0032481                               | positive regulation of type I interferon production                                     | 59   | 3  | 0.0004   |
| GO:0042542                               | response to hydrogen peroxide                                                           | 102  | 3  | 0.00048  |
| GO:0001541                               | ovarian follicle development                                                            | 33   | 2  | 0.00052  |
| GO:0032755                               | positive regulation of interleukin-6 production                                         | 40   | 2  | 0.00076  |
| GO:0043525                               | positive regulation of neuron apoptotic process                                         | 41   | 2  | 0.0008   |
| GO:0019221                               | cytokine-mediated signaling pathway                                                     | 425  | 5  | 0.00084  |
| GO:0006919                               | activation of cysteine-type endopeptidase activity involved in apoptotic process        | 53   | 3  | 0.00086  |
| GO:1901224                               | positive regulation of NIK/NF-kappaB signaling                                          | 45   | 2  | 0.00096  |
| GO:2001244                               | positive regulation of intrinsic apoptotic signaling pathway                            | 47   | 2  | 0.00105  |
| <b>Gene set: increased in ≥3 studies</b> |                                                                                         |      |    |          |
| GO:0001782                               | B cell homeostasis                                                                      | 19   | 2  | 3.10E-05 |
| GO:1904646                               | cellular response to amyloid-beta                                                       | 25   | 2  | 5.40E-05 |
| GO:0048011                               | neurotrophin TRK receptor signaling pathway                                             | 28   | 2  | 6.80E-05 |
| GO:0043525                               | positive regulation of neuron apoptotic process                                         | 41   | 2  | 0.00015  |
| GO:0071887                               | leukocyte apoptotic process                                                             | 60   | 2  | 0.00153  |
| <b>Gene set: decreased in ≥1 study</b>   |                                                                                         |      |    |          |
| GO:2000463                               | positive regulation of excitatory postsynaptic potential                                | 25   | 7  | 1.50E-06 |
| GO:0014047                               | glutamate secretion                                                                     | 35   | 9  | 1.90E-06 |
| GO:0048172                               | regulation of short-term neuronal synaptic plasticity                                   | 12   | 5  | 5.50E-06 |
| GO:0048169                               | regulation of long-term neuronal synaptic plasticity                                    | 24   | 6  | 1.70E-05 |
| GO:0035418                               | protein localization to synapse                                                         | 51   | 12 | 1.90E-05 |
| GO:0050885                               | neuromuscular process controlling balance                                               | 36   | 7  | 2.00E-05 |
| GO:0070588                               | calcium ion transmembrane transport                                                     | 194  | 19 | 5.50E-05 |
| GO:0007269                               | neurotransmitter secretion                                                              | 124  | 23 | 8.70E-05 |
| GO:0007268                               | chemical synaptic transmission                                                          | 467  | 57 | 8.80E-05 |
| GO:0061003                               | positive regulation of dendritic spine morphogenesis                                    | 20   | 5  | 9.10E-05 |
| GO:0099509                               | regulation of presynaptic cytosolic calcium ion concentration                           | 11   | 4  | 9.60E-05 |
| GO:2000300                               | regulation of synaptic vesicle exocytosis                                               | 59   | 11 | 9.70E-05 |
| GO:0050808                               | synapse organization                                                                    | 328  | 31 | 0.0001   |
| GO:0061337                               | cardiac conduction                                                                      | 96   | 13 | 0.00017  |
| GO:0035176                               | social behavior                                                                         | 35   | 6  | 0.00017  |
| GO:0016188                               | synaptic vesicle maturation                                                             | 7    | 4  | 0.00026  |
| GO:0071625                               | vocalization behavior                                                                   | 14   | 4  | 0.00028  |
| GO:0007399                               | nervous system development                                                              | 1653 | 83 | 0.00034  |
| GO:0097091                               | synaptic vesicle clustering                                                             | 16   | 4  | 0.00048  |
| GO:0007420                               | brain development                                                                       | 522  | 30 | 0.00054  |
| GO:0099526                               | presynapse to nucleus signaling pathway                                                 | 2    | 2  | 0.00058  |
| GO:0010701                               | positive regulation of norepinephrine secretion                                         | 2    | 2  | 0.00058  |
| GO:1903779                               | regulation of cardiac conduction                                                        | 52   | 7  | 0.00068  |
| GO:0007612                               | learning                                                                                | 120  | 14 | 0.00068  |
| GO:0090129                               | positive regulation of synapse maturation                                               | 8    | 3  | 0.00071  |
| GO:0007613                               | memory                                                                                  | 91   | 10 | 0.00073  |
| GO:0048813                               | dendrite morphogenesis                                                                  | 121  | 14 | 0.00095  |
| GO:0048488                               | synaptic vesicle endocytosis                                                            | 35   | 7  | 0.00114  |

|            |                                                                         |     |    |         |
|------------|-------------------------------------------------------------------------|-----|----|---------|
| GO:0001975 | response to amphetamine                                                 | 20  | 4  | 0-00119 |
| GO:0007190 | activation of adenylate cyclase activity                                | 20  | 4  | 0-00119 |
| GO:0030534 | adult behavior                                                          | 96  | 10 | 0-00133 |
| GO:0050966 | detection of mechanical stimulus involved in sensory perception of pain | 10  | 3  | 0-00147 |
| GO:0099132 | ATP hydrolysis coupled cation transmembrane transport                   | 42  | 5  | 0-00171 |
| GO:2000821 | regulation of grooming behavior                                         | 3   | 2  | 0-00172 |
| GO:0097116 | gephyrin clustering involved in postsynaptic density assembly           | 3   | 2  | 0-00172 |
| GO:0048499 | synaptic vesicle membrane organization                                  | 3   | 2  | 0-00172 |
| GO:0000165 | MAPK cascade                                                            | 564 | 25 | 0-00179 |
| GO:0051965 | positive regulation of synapse assembly                                 | 55  | 7  | 0-0018  |
| GO:0007186 | G protein-coupled receptor signaling pathway                            | 426 | 29 | 0-00197 |
| GO:0048013 | ephrin receptor signaling pathway                                       | 74  | 7  | 0-00201 |
| GO:0007010 | cytoskeleton organization                                               | 815 | 30 | 0-00222 |
| GO:0016079 | synaptic vesicle exocytosis                                             | 87  | 16 | 0-00229 |
| GO:0034765 | regulation of ion transmembrane transport                               | 300 | 23 | 0-0025  |
| GO:1904646 | cellular response to amyloid-beta                                       | 25  | 4  | 0-00282 |
| GO:0070327 | thyroid hormone transport                                               | 4   | 2  | 0-00338 |
| GO:0097118 | neuroligin clustering involved in postsynaptic membrane assembly        | 4   | 2  | 0-00338 |
| GO:0048790 | maintenance of presynaptic active zone structure                        | 4   | 2  | 0-00338 |
| GO:0034332 | adherens junction organization                                          | 113 | 7  | 0-00426 |
| GO:0034199 | activation of protein kinase A activity                                 | 15  | 3  | 0-00511 |
| GO:0071377 | cellular response to glucagon stimulus                                  | 15  | 3  | 0-00511 |

## References for supplementary materials

- 1 Bao G, Han Y, Wang M, *et al.* Relationship between cellular apoptosis and the expression of p75 neurotrophin receptor and tyrosine kinase A receptor in tissue surrounding haematoma in intracerebral haemorrhage. *J Int Med Res* 2011;**39**:150–60. doi:10.1177/147323001103900116
- 2 Bao G, Li Q, Han Y, *et al.* Role of the nerve growth factor precursor-neurotrophin receptor p75 and sortilin pathway on apoptosis in the brain of patients with intracerebral hemorrhage. *Neural Regeneration Research* 2011;**6**:1696–700.
- 3 Camacho J, Moliné T, Bonaterra-Pastra A, *et al.* Brain ApoA-I, ApoJ and ApoE Immunodetection in Cerebral Amyloid Angiopathy. *Front Neurol* 2019;**10**:187. doi:10.3389/fneur.2019.00187
- 4 Carmichael ST, Vespa PM, Saver JL, *et al.* Genomic profiles of damage and protection in human intracerebral hemorrhage. *J Cereb Blood Flow Metab* 2008;**28**:1860–75. doi:10.1038/jcbfm.2008.77
- 5 Chen L, Guo F, Li X, *et al.* Real-time analysis of inflammatory cytokines and regulatory gene expression in tissues surrounding the hematoma after intracerebral hemorrhage. *Neural Regeneration Research* 2008;**3**:1197–202.
- 6 Dahnovici RM, Pintea IL, Mălăescu DG, *et al.* Microscopic aspects of macrophage system cells in hemorrhagic stroke in humans. *Rom J Morphol Embryol* 2011;**52**:1249–53.
- 7 Delgado P, Cuadrado E, Rosell A, *et al.* Fas system activation in perihematomal areas after spontaneous intracerebral hemorrhage. *Stroke* 2008;**39**:1730–4. doi:10.1161/STROKEAHA.107.500876
- 8 Di Napoli M, Godoy DA, Campi V, *et al.* C-reactive protein in intracerebral hemorrhage: time course, tissue localization, and prognosis. *Neurology* 2012;**79**:690–9. doi:10.1212/WNL.0b013e318264e3be
- 9 Duan S, Wang X, Wang C, *et al.* [Expressions of heme oxygenase-1 and apoptosis-modulating proteins in peri-hematoma cortex after intracerebral hemorrhage in human being]. *Zhonghua Yi Xue Za Zhi* 2007;**87**:1904–7.
- 10 Gang X, Han Q, Zhao X, *et al.* Dynamic Changes in Toll-Like Receptor 4 in Human Perihematoma Tissue after Intracerebral Hemorrhage. *World Neurosurg* 2018;**118**:e593–600. doi:10.1016/j.wneu.2018.06.247
- 11 Guo F, Xu Y, Chen L, *et al.* [The relationship between the aquaporin-4 and brain edema, pathologic change, ultrastructure in peri-hematoma tissue in patients with intracerebral hemorrhage]. *Zhongguo Wei Zhong Bing Ji Jiu Yi Xue* 2008;**20**:674–7.
- 12 Hernandez-Guillamon M, Solé M, Delgado P, *et al.* VAP-1/SSAO plasma activity and brain expression in human hemorrhagic stroke. *Cerebrovasc Dis* 2012;**33**:55–63. doi:10.1159/000333370
- 13 Holfelder K, Schittenhelm J, Trautmann K, *et al.* De novo expression of the hemoglobin scavenger receptor CD163 by activated microglia is not associated with hemorrhages in human brain lesions. *Histol Histopathol* 2011;**26**:1007–17. doi:10.14670/HH-26.1007
- 14 Itoh Y, Yamada M. Cerebral amyloid angiopathy in the elderly: the clinicopathological features, pathogenesis, and risk factors. *J Med Dent Sci* 1997;**44**:11–9.
- 15 Jin K, Mao X, Xie L, *et al.* Neuroglobin expression in human arteriovenous malformation and intracerebral hemorrhage. *Acta Neurochir Suppl* 2011;**111**:315–9. doi:10.1007/978-3-7091-0693-8\_52
- 16 Ke S, Jin X, Zhang K, *et al.* [Study on expression of matrix metalloproteinase-2 and matrix metalloproteinase-9 in brain tissue adjacent to hemorrhage after brain hemorrhage in human]. *Zhongguo Wei Zhong Bing Ji Jiu Yi Xue* 2007;**19**:336–9.
- 17 Li H, Wang S-R, Wang L-K, *et al.* Perihematomal pathological changes in neurons and astrocytes following acute cerebral hemorrhage. *Int J Neurosci* 2010;**120**:683–90. doi:10.3109/00207454.2010.513460
- 18 Liu B, Hu B, Shao S, *et al.* CD163/Hemoglobin Oxygenase-1 Pathway Regulates Inflammation in Hematoma Surrounding Tissues after Intracerebral Hemorrhage. *J Stroke Cerebrovasc Dis* 2015;**24**:2800–9. doi:10.1016/j.jstrokecerebrovasdis.2015.08.013
- 19 Liu QX, Zhang HL, Zhang SM. The expressions of hypoxia-inducible factor-1 $\alpha$  and its significance in perihematomal issue in human intracerebral hemorrhage. *Chinese Journal of Neurology* 2006;**39**:24–6.
- 20 Mantle D, Siddique S, Eddeb F, *et al.* Comparison of protein carbonyl and antioxidant levels in brain tissue from intracerebral haemorrhage and control cases. *Clin Chim Acta* 2001;**312**:185–90. doi:10.1016/s0009-8981(01)00623-4



- 21 McCarron MO, Nicoll JA, Stewart J, *et al.* The apolipoprotein E epsilon2 allele and the pathological features in cerebral amyloid angiopathy-related hemorrhage. *J Neuropathol Exp Neurol* 1999;**58**:711–8. doi:10.1097/00005072-199907000-00005
- 22 Rosell A, Vilalta A, García-Berrocso T, *et al.* Brain perihematoma genomic profile following spontaneous human intracerebral hemorrhage. *PLoS One* 2011;**6**:e16750. doi:10.1371/journal.pone.0016750
- 23 Rosell A, Ortega-Aznar A, Alvarez-Sabín J, *et al.* Increased brain expression of matrix metalloproteinase-9 after ischemic and hemorrhagic human stroke. *Stroke* 2006;**37**:1399–406. doi:10.1161/01.STR.0000223001.06264.af
- 24 Shen J, Xie L, Mao X, *et al.* Neurogenesis after primary intracerebral hemorrhage in adult human brain. *J Cereb Blood Flow Metab* 2008;**28**:1460–8. doi:10.1038/jcbfm.2008.37
- 25 Shtaya A, Bridges LR, Esiri MM, *et al.* Rapid neuroinflammatory changes in human acute intracerebral hemorrhage. *Ann Clin Transl Neurol* 2019;**6**:1465–79. doi:10.1002/acn3.50842
- 26 Tanskanen M, Myllykangas L, Saarialho-Kere U, *et al.* Matrix metalloproteinase- $\beta$ 19 expressed in cerebral amyloid angiopathy. *Amyloid* 2011;**18**:3–9. doi:10.3109/13506129.2010.541960
- 27 Vakulenko NN. [Pathohistologic and biochemical changes in the brain in atherosclerosis with hemorrhagic foci]. *Zh Nevropatol Psikhiatr Im S S Korsakova* 1977;**77**:993–5.
- 28 Wang D, Guo F, Sun X, *et al.* Redox factor 1 inhibits the apoptosis process after intracerebral hemorrhage. *Neural Res* 2011;**33**:681–5. doi:10.1179/1743132810Y.0000000021
- 29 Wang Y-X, Yan A, Ma Z-H, *et al.* Nuclear factor- $\kappa$ B and apoptosis in patients with intracerebral hemorrhage. *J Clin Neurosci* 2011;**18**:1392–5. doi:10.1016/j.jocn.2010.11.039
- 30 Wang D, Qi J, Li G. Study on the association of reaction of astrocytes with cyclin D1 protein in peripheral tissue of human brain hemorrhagic area. *Zhonghua Yi Xue Za Zhi* 2004;**84**:1710–2.
- 31 Wu C, Yan X, Liao Y, *et al.* Increased perihematoma neuron autophagy and plasma thrombin-antithrombin levels in patients with intracerebral hemorrhage: An observational study. *Medicine* 2019;**98**:e17130. doi:10.1097/MD.00000000000017130
- 32 Wu H, Zhang Z, Hu X, *et al.* Dynamic changes of inflammatory markers in brain after hemorrhagic stroke in humans: a postmortem study. *Brain Res* 2010;**1342**:111–7. doi:10.1016/j.brainres.2010.04.033
- 33 Wu H, Zhao R, Qi J, *et al.* The expression and the role of protease nexin-1 on brain edema after intracerebral hemorrhage. *J Neurol Sci* 2008;**270**:172–83. doi:10.1016/j.jns.2008.03.010
- 34 Wu C, Ding X, Wang H, *et al.* [Neural apoptosis and apoptosis-related genes in intracerebral hemorrhage patients]. *Zhonghua Yi Xue Za Zhi* 2006;**86**:3073–6.
- 35 Yilmaz A, Fuchs T, Dietel B, *et al.* Transient decrease in circulating dendritic cell precursors after acute stroke: potential recruitment into the brain. *Clin Sci* 2009;**118**:147–57. doi:10.1042/CS20090154
- 36 Zhang XW, Wu Y, Wang DK, *et al.* Expression changes of inflammatory cytokines TNF- $\alpha$ , IL-1 $\beta$  and HO-1 in hematoma surrounding brain areas after intracerebral hemorrhage. *J Biol Regul Homeost Agents* 2019;**33**:1359–67. doi:10.23812/19-150-A
- 37 Zhang Z-L, Liu Y-G, Huang Q-B, *et al.* Nuclear factor- $\kappa$ B activation in perihematoma brain tissue correlates with outcome in patients with intracerebral hemorrhage. *J Neuroinflammation* 2015;**12**:53. doi:10.1186/s12974-015-0277-9
- 38 Zhang Z, Liu Y, Huang Q, *et al.* NF- $\kappa$ B activation and cell death after intracerebral hemorrhage in patients. *Neurological sciences: official journal of the Italian Neurological Society and of the Italian Society of Clinical Neurophysiology* 2014;**35**:1097–102.
- 39 Zhang X, Zhang Z, Yin X, *et al.* Exploring the optimal operation time for patients with hypertensive intracerebral hemorrhage: tracking the expression and progress of cell apoptosis of prehematoma brain tissues. *Chin Med J* 2010;**123**:1246–50.
- 40 Zhang Z, Qi J, Zhu H, *et al.* Expression of thrombin and its associated protein in cerebellum of human and rat after intracerebral hemorrhage. *Chin Med J* 2010;**123**:2077–81.
- 41 Zhang WW, Huang YH, Li J, *et al.* Altered expression of endothelin-1 in perihematoma astrocytes in patients with intracerebral hemorrhage. *Chinese Journal of Clinical Rehabilitation* 2003;**8**:180–1.
- 42 Zhang X, Zhang W, Hao X. The expression of glucose transporter protein one in the astrocytes of the human brain with hypertensive intracerebral hemorrhage. *Chinese Journal of Neurology* 2000;**33**:176–8.
- 43 Zhao J, Mao Q, Qian Z, *et al.* Effect of mild hypothermia on expression of inflammatory factors in surrounding tissue after minimally invasive hematoma evacuation in the treatment of hypertensive intracerebral hemorrhage. *Exp Ther Med* 2018;**15**:4906–10. doi:10.3892/etm.2018.6014
- 44 Zhu S, Tang Z, Guo S, *et al.* Experimental study on the expression of HIF-1 $\alpha$  and its

relationship to apoptosis in tissues around cerebral bleeding loci. *J Huazhong Univ Sci Technolog Med Sci* 2004;**24**:373–5. doi:10.1007/BF02861871
